# Supplementary material
Source: publisher site journal article supplement (https://www.spandidos-publications.com/897/downloadSupplementary)
Supplement: Supplementary file 1 [file downloadSupplementary]

## Sheet: High expression of STAT1
Table SIII. GSEA oncogenic signatures results. GSEA outcomes of the c6 (c6.all.v6.2.symbols.gmt) reference gene set for the key genes in the Janus kinase-signal transducer and activator of transcription signaling pathway in skin cutaneous melanoma. GSEA, gene set enrichment analysis. GSEA, gene set enrich analysis; ES, enrichment score; NES, normalized enrichment score; NOM, nominal; FDR, false d…
Name	Size	ES	NES	NOM P-value	FDR q-value	FWER p-value	Rank to max	Leading edge
KRAS.LUNG_UP.V1_UP	79	0.42999	1.68755	<0.001	0.375502	0.373	2505	tags=44%, list=23%, signal=57%
KRAS.600.LUNG.BREAST_UP.V1_UP	154	0.390348	1.64616	<0.001	0.331875	0.477	2349	tags=40%, list=22%, signal=50%
RELA_DN.V1_DN	74	0.426526	1.69614	0.00200401	0.52473	0.358	1895	tags=39%, list=18%, signal=47%
NOTCH_DN.V1_UP	102	0.395044	1.64991	0.00203252	0.401186	0.468	2270	tags=36%, list=21%, signal=45%
P53_DN.V2_UP	87	0.448543	1.70916	0.00404858	0.924223	0.335	1985	tags=38%, list=18%, signal=46%
KRAS.LUNG.BREAST_UP.V1_UP	77	0.433797	1.63394	0.00621118	0.305618	0.502	2654	tags=48%, list=25%, signal=63%
WNT_UP.V1_DN	99	0.369446	1.57489	0.015748	0.41592	0.62	2121	tags=28%, list=20%, signal=35%
KRAS.600_UP.V1_UP	153	0.337799	1.46489	0.0200803	0.463322	0.82	2216	tags=38%, list=20%, signal=47%
ESC_J1_UP_LATE.V1_DN	108	0.315996	1.41785	0.0266393	0.482309	0.87	1453	tags=24%, list=13%, signal=28%
ALK_DN.V1_UP	73	0.379251	1.48454	0.0283401	0.473135	0.789	2231	tags=37%, list=21%, signal=46%
CAHOY_OLIGODENDROCUTIC	55	0.383007	1.49383	0.0305344	0.59198	0.775	2690	tags=38%, list=25%, signal=51%
PDGF_UP.V1_DN	75	0.362376	1.45785	0.0394191	0.42485	0.833	2963	tags=41%, list=27%, signal=57%
IL21_UP.V1_UP	106	0.372102	1.47896	0.040568	0.453624	0.801	1889	tags=35%, list=17%, signal=42%
KRAS.KIDNEY_UP.V1_DN	75	0.37914	1.41622	0.0519751	0.461093	0.871	1574	tags=27%, list=15%, signal=31%
CYCLIN_D1_UP.V1_DN	101	0.328343	1.42338	0.0553279	0.494096	0.867	2951	tags=39%, list=27%, signal=53%
MEL18_DN.V1_UP	73	0.398382	1.50406	0.0571429	0.619357	0.758	2525	tags=40%, list=23%, signal=51%
NFE2L2.V2	250	0.269428	1.26333	0.060166	0.496764	0.977	1881	tags=26%, list=17%, signal=30%
CAMP_UP.V1_DN	121	0.342183	1.40891	0.061144	0.457261	0.877	3203	tags=41%, list=30%, signal=58%
LEF1_UP.V1_DN	109	0.325192	1.37318	0.0740741	0.49096	0.919	3276	tags=46%, list=30%, signal=65%
JNK_DN.V1_UP	99	0.32433	1.37109	0.0781893	0.476258	0.921	2547	tags=37%, list=24%, signal=48%
BMI1_DN_MEL18_DN.V1_UP	72	0.403783	1.48883	0.0795918	0.501764	0.778	2525	tags=44%, list=23%, signal=58%
BMI1_DN.V1_UP	76	0.402381	1.45918	0.0829876	0.447988	0.832	2525	tags=41%, list=23%, signal=53%
ATM_DN.V1_DN	77	0.352512	1.38569	0.0835073	0.476416	0.907	2791	tags=40%, list=26%, signal=54%
KRAS.BREAST_UP.V1_UP	68	0.356419	1.32318	0.0869565	0.511486	0.952	2590	tags=43%, list=24%, signal=56%
PKCA_DN.V1_DN	92	0.301324	1.30264	0.0890269	0.517709	0.962	2026	tags=33%, list=19%, signal=40%
RELA_DN.V1_UP	84	0.339266	1.36605	0.0901961	0.469187	0.922	3297	tags=48%, list=30%, signal=68%
STK33_NOMO_DN	147	0.276521	1.28755	0.0922131	0.486003	0.969	2109	tags=25%, list=19%, signal=31%
CSR_LATE_UP.V1_UP	102	0.406102	1.48934	0.0969697	0.54957	0.777	4081	tags=60%, list=38%, signal=95%
CSR_EARLY_UP.V1_UP	92	0.374451	1.39584	0.097561	0.471257	0.897	3610	tags=49%, list=33%, signal=73%
KRAS.DF.V1_UP	123	0.336375	1.35495	0.1	0.478012	0.93	2958	tags=39%, list=27%, signal=53%
ALK_DN.V1_DN	73	0.332411	1.3024	0.10883	0.502654	0.962	1779	tags=26%, list=16%, signal=31%
KRAS.PROSTATE_UP.V1_DN	87	0.356678	1.33769	0.11134	0.488383	0.942	2408	tags=39%, list=22%, signal=50%
PRC2_SUZ12_UP.V1_DN	102	0.325243	1.2946	0.112245	0.494505	0.967	1947	tags=31%, list=18%, signal=38%
DCA_UP.V1_UP	95	0.305439	1.27792	0.112245	0.497176	0.972	2439	tags=32%, list=23%, signal=40%
KRAS.PROSTATE_UP.V1_UP	71	0.32634	1.30822	0.120833	0.519705	0.96	1925	tags=30%, list=18%, signal=36%
CYCLIN_D1_KE_.V1_UP	113	0.328341	1.29103	0.130901	0.490037	0.967	1315	tags=23%, list=12%, signal=26%
PRC2_EZH2_UP.V1_DN	101	0.322011	1.32074	0.134387	0.501064	0.953	2049	tags=28%, list=19%, signal=34%
DCA_UP.V1_DN	107	0.267054	1.20662	0.135802	0.46855	0.993	2529	tags=32%, list=23%, signal=41%
IL15_UP.V1_DN	88	0.315362	1.26164	0.1423	0.488209	0.977	2524	tags=40%, list=23%, signal=51%
PKCA_DN.V1_UP	82	0.314828	1.21324	0.14557	0.498585	0.992	1670	tags=27%, list=15%, signal=31%
KRAS.300_UP.V1_UP	81	0.320311	1.26738	0.149515	0.498904	0.977	2216	tags=36%, list=20%, signal=45%
ESC_J1_UP_EARLY.V1_DN	113	0.280377	1.22806	0.152174	0.525705	0.986	2556	tags=31%, list=24%, signal=40%
YAP1_DN	25	0.38747	1.29578	0.159919	0.505924	0.966	3311	tags=52%, list=31%, signal=75%
CTIP_DN.V1_DN	72	0.31569	1.22466	0.163306	0.510879	0.986	1898	tags=32%, list=18%, signal=38%
ATF2_S_UP.V1_DN	108	0.300158	1.22928	0.165605	0.534717	0.986	1412	tags=24%, list=13%, signal=27%
AKT_UP.V1_UP	104	0.303069	1.25355	0.169492	0.497387	0.979	2151	tags=32%, list=20%, signal=39%
PTEN_DN.V1_DN	94	0.299917	1.20875	0.175476	0.49057	0.993	1302	tags=22%, list=12%, signal=25%
CYCLIN_D1_KE_.V1_DN	97	0.302931	1.20777	0.177189	0.483307	0.993	2863	tags=40%, list=26%, signal=54%
RPS14_DN.V1_UP	105	0.399996	1.34465	0.177645	0.487739	0.937	2328	tags=41%, list=21%, signal=52%
IL2_UP.V1_UP	110	0.30045	1.21627	0.190083	0.511043	0.99	3193	tags=40%, list=29%, signal=56%
PRC2_EZH2_UP.V1_UP	111	0.313766	1.21897	0.194	0.515172	0.989	2143	tags=32%, list=20%, signal=39%
STK33_SKM_UP	147	0.298209	1.22599	0.195219	0.518602	0.986	2475	tags=31%, list=23%, signal=39%
EGFR_UP.V1_UP	114	0.313523	1.21549	0.196687	0.502996	0.992	3282	tags=43%, list=30%, signal=61%
ESC_V6.5_UP_LATE.V1_DN	112	0.266732	1.18874	0.197095	0.467668	0.994	1214	tags=20%, list=11%, signal=22%
SNF5_DN.V1_UP	106	0.325532	1.27195	0.206061	0.499909	0.977	3062	tags=41%, list=28%, signal=56%
MTOR_UP.N4.V1_UP	104	0.273946	1.18498	0.21308	0.460783	0.994	2188	tags=27%, list=20%, signal=33%
RPS14_DN.V1_DN	106	0.302891	1.20718	0.213693	0.475924	0.993	3483	tags=42%, list=32%, signal=62%
AKT_UP_MTOR_DN.V1_UP	102	0.29386	1.19422	0.21519	0.464083	0.993	2151	tags=33%, list=20%, signal=41%
KRAS.50_UP.V1_UP	27	0.366848	1.20908	0.216433	0.499238	0.993	2552	tags=44%, list=24%, signal=58%
KRAS.DF.V1_DN	109	0.289038	1.18437	0.216535	0.454977	0.994	1987	tags=27%, list=18%, signal=32%
CAHOY_ASTROGLIAL	57	0.346209	1.20095	0.217391	0.456837	0.993	2365	tags=39%, list=22%, signal=49%
IL15_UP.V1_UP	101	0.299971	1.20274	0.220374	0.460701	0.993	3193	tags=41%, list=29%, signal=57%
NRL_DN.V1_UP	82	0.273348	1.15772	0.225941	0.505464	0.998	2493	tags=30%, list=23%, signal=39%
SNF5_DN.V1_DN	97	0.276757	1.13891	0.22973	0.509595	1	2149	tags=27%, list=20%, signal=33%
KRAS.50_UP.V1_DN	31	0.408027	1.20478	0.230303	0.464206	0.993	1894	tags=39%, list=17%, signal=47%
TBK1.DN.48HRS_DN	29	0.318387	1.14747	0.249497	0.505874	0.998	496	tags=14%, list=5%, signal=14%
EGFR_UP.V1_DN	117	0.253173	1.1127	0.258824	0.530614	1	1708	tags=23%, list=16%, signal=27%
KRAS.AMP.LUNG_UP.V1_UP	76	0.289954	1.14072	0.260692	0.51276	1	2331	tags=29%, list=22%, signal=37%
VEGF_A_UP.V1_DN	118	0.350906	1.23819	0.263862	0.524045	0.985	3653	tags=47%, list=34%, signal=71%
KRAS.300_UP.V1_DN	83	0.32522	1.14867	0.265432	0.510719	0.998	2114	tags=30%, list=20%, signal=37%
CRX_DN.V1_DN	86	0.271485	1.11445	0.267782	0.541225	1	2474	tags=35%, list=23%, signal=45%
CTIP_DN.V1_UP	71	0.288257	1.12045	0.268775	0.535309	1	1972	tags=28%, list=18%, signal=34%
ATF2_UP.V1_UP	108	0.261532	1.10301	0.268994	0.517681	1	2791	tags=34%, list=26%, signal=46%
KRAS.LUNG_UP.V1_DN	79	0.360919	1.18686	0.273279	0.463965	0.994	2114	tags=30%, list=20%, signal=37%
PRC1_BMI_UP.V1_DN	93	0.279833	1.10797	0.27551	0.520038	1	1472	tags=23%, list=14%, signal=26%
RB_P130_DN.V1_DN	81	0.320006	1.1508	0.280632	0.513229	0.998	4000	tags=53%, list=37%, signal=84%
NOTCH_DN.V1_DN	95	0.275054	1.10665	0.283096	0.516558	1	1508	tags=24%, list=14%, signal=28%
LTE2_UP.V1_DN	118	0.285248	1.12158	0.287645	0.539826	1	2970	tags=36%, list=27%, signal=50%
E2F1_UP.V1_DN	121	0.25673	1.1021	0.289308	0.513039	1	1934	tags=26%, list=18%, signal=31%
JNK_DN.V1_DN	91	0.260106	1.09226	0.291667	0.508893	1	1925	tags=25%, list=18%, signal=30%
BRCA1_DN.V1_DN	70	0.273972	1.11326	0.293139	0.53629	1	2174	tags=26%, list=20%, signal=32%
HOXA9_DN.V1_UP	108	0.284653	1.11059	0.304519	0.521256	1	2432	tags=31%, list=22%, signal=40%
MEK_UP.V1_UP	117	0.277733	1.0942	0.316532	0.517225	1	2123	tags=26%, list=20%, signal=32%
RB_DN.V1_UP	74	0.291165	1.11127	0.325678	0.526667	1	2613	tags=34%, list=24%, signal=44%
CORDENONSI_YAP_CONSERVED_SIGNATURE	38	0.318425	1.09308	0.332681	0.513257	1	3193	tags=42%, list=29%, signal=60%
CAMP_UP.V1_UP	114	0.248694	1.07729	0.341202	0.529524	1	2580	tags=28%, list=24%, signal=36%
ESC_J1_UP_LATE.V1_UP	112	0.261782	1.06802	0.342857	0.537756	1	1984	tags=25%, list=18%, signal=30%
GCNP_SHH_UP_LATE.V1_UP	104	0.299937	1.0943	0.346591	0.523254	1	2807	tags=35%, list=26%, signal=46%
JAK2_DN.V1_UP	100	0.272644	1.07822	0.349794	0.533477	1	1909	tags=23%, list=18%, signal=28%
GCNP_SHH_UP_LATE.V1_DN	104	0.279546	1.07166	0.35343	0.536293	1	1630	tags=25%, list=15%, signal=29%
KRAS.600_UP.V1_DN	157	0.274754	1.05247	0.357873	0.565385	1	1894	tags=25%, list=17%, signal=30%
STK33_DN	145	0.218072	1.02383	0.381053	0.580176	1	1785	tags=21%, list=16%, signal=24%
KRAS.LUNG.BREAST_UP.V1_DN	77	0.297691	1.04722	0.383333	0.570822	1	1894	tags=26%, list=17%, signal=31%
P53_DN.V1_UP	110	0.281135	1.04143	0.384146	0.57108	1	3085	tags=40%, list=28%, signal=55%
PTEN_DN.V2_DN	76	0.257707	1.03773	0.387164	0.57282	1	2608	tags=30%, list=24%, signal=40%
SRC_UP.V1_DN	93	0.250184	1.04197	0.387795	0.575896	1	1302	tags=18%, list=12%, signal=21%
ATM_DN.V1_UP	76	0.262183	1.03652	0.393684	0.56953	1	1989	tags=25%, list=18%, signal=30%
LEF1_UP.V1_UP	112	0.244966	1.03102	0.40121	0.570215	1	1863	tags=26%, list=17%, signal=31%
ATF2_S_UP.V1_UP	97	0.234718	1.0104	0.410526	0.592462	1	1721	tags=21%, list=16%, signal=24%
TBK1.DF_DN	170	0.27439	1.03497	0.414449	0.567196	1	3573	tags=40%, list=33%, signal=59%
YAP1_UP	25	0.285185	1.02304	0.418146	0.576201	1	1696	tags=24%, list=16%, signal=28%
CYCLIN_D1_UP.V1_UP	114	0.276725	1.01751	0.436214	0.582163	1	1531	tags=21%, list=14%, signal=24%
NRL_DN.V1_DN	69	0.240101	1.00199	0.448637	0.604597	1	2221	tags=28%, list=21%, signal=34%
GCNP_SHH_UP_EARLY.V1_DN	100	0.220612	0.998759	0.450413	0.594314	1	3279	tags=42%, list=30%, signal=60%
MYC_UP.V1_DN	93	0.24565	1.00157	0.450704	0.599539	1	2083	tags=28%, list=19%, signal=34%
TGFB_UP.V1_UP	105	0.256828	0.999603	0.453061	0.597638	1	3324	tags=42%, list=31%, signal=60%
RB_DN.V1_DN	64	0.25952	0.997229	0.457906	0.592261	1	3097	tags=39%, list=29%, signal=54%
CRX_DN.V1_UP	75	0.231192	0.988224	0.482255	0.606527	1	1695	tags=20%, list=16%, signal=24%
PTEN_DN.V2_UP	77	0.2507	0.970413	0.482474	0.640191	1	2987	tags=40%, list=28%, signal=55%
PTEN_DN.V1_UP	99	0.232532	0.963132	0.486274	0.644183	1	1963	tags=23%, list=18%, signal=28%
CRX_NRL_DN.V1_DN	63	0.241389	0.964323	0.492784	0.64732	1	2881	tags=33%, list=27%, signal=45%
VEGF_A_UP.V1_UP	110	0.250414	0.954247	0.496047	0.651633	1	2823	tags=36%, list=26%, signal=49%
KRAS.AMP.LUNG_UP.V1_DN	71	0.244449	0.95777	0.511022	0.649952	1	1051	tags=17%, list=10%, signal=19%
PIGF_UP.V1_UP	106	0.289076	0.946216	0.512476	0.663854	1	3486	tags=41%, list=32%, signal=59%
ERB2_UP.V1_DN	118	0.281869	0.933249	0.531915	0.668942	1	3485	tags=39%, list=32%, signal=57%
MEK_UP.V1_DN	115	0.241349	0.931805	0.559454	0.666636	1	1865	tags=23%, list=17%, signal=27%
RAPA_EARLY_UP.V1_UP	104	0.232471	0.938387	0.562762	0.67482	1	2598	tags=31%, list=24%, signal=40%
ESC_J1_UP_EARLY.V1_UP	88	0.227087	0.933858	0.567073	0.673312	1	3248	tags=39%, list=30%, signal=55%
E2F1_UP.V1_UP	100	0.22871	0.890074	0.572534	0.701107	1	1210	tags=13%, list=11%, signal=15%
IL2_UP.V1_DN	94	0.225844	0.912882	0.574953	0.696501	1	986	tags=16%, list=9%, signal=17%
PDGF_ERK_DN.V1_DN	83	0.237358	0.896039	0.575884	0.705276	1	2715	tags=28%, list=25%, signal=37%
RB_P107_DN.V1_DN	73	0.236822	0.907309	0.589404	0.697929	1	2867	tags=33%, list=26%, signal=44%
CRX_NRL_DN.V1_UP	79	0.225724	0.934821	0.592357	0.676654	1	2404	tags=25%, list=22%, signal=32%
STK33_UP	144	0.224324	0.870225	0.596386	0.731421	1	2409	tags=27%, list=22%, signal=34%
KRAS.600.LUNG.BREAST_UP.V1_DN	145	0.22603	0.896371	0.607069	0.710191	1	1463	tags=19%, list=14%, signal=21%
ESC_V6.5_UP_EARLY.V1_DN	109	0.226512	0.908615	0.608051	0.700744	1	3247	tags=37%, list=30%, signal=52%
ATF2_UP.V1_DN	100	0.223597	0.914014	0.613095	0.700037	1	1155	tags=15%, list=11%, signal=17%
ESC_V6.5_UP_EARLY.V1_UP	83	0.220367	0.891529	0.621951	0.703763	1	1823	tags=22%, list=17%, signal=26%
PRC2_SUZ12_UP.V1_UP	105	0.213124	0.89201	0.64086	0.708228	1	2539	tags=32%, list=23%, signal=42%
PRC1_BMI_UP.V1_UP	94	0.210849	0.89762	0.64466	0.712762	1	2386	tags=28%, list=22%, signal=35%
JAK2_DN.V1_DN	73	0.22937	0.858699	0.662083	0.749572	1	1292	tags=16%, list=12%, signal=19%
TBK1.DF_UP	147	0.191032	0.876522	0.677551	0.723656	1	2965	tags=31%, list=27%, signal=43%
STK33_NOMO_UP	142	0.207371	0.801117	0.693227	0.825916	1	2328	tags=25%, list=21%, signal=32%
TBK1.DN.48HRS_UP	28	0.245764	0.842687	0.695049	0.776872	1	1812	tags=21%, list=17%, signal=26%
PIGF_UP.V1_DN	112	0.215866	0.84083	0.698347	0.774839	1	2351	tags=28%, list=22%, signal=35%
RB_P107_DN.V1_UP	87	0.232248	0.763797	0.724359	0.868615	1	3532	tags=43%, list=33%, signal=63%
IL21_UP.V1_DN	96	0.206647	0.826702	0.737475	0.786945	1	2207	tags=27%, list=20%, signal=34%
MTOR_UP.V1_UP	90	0.200507	0.840469	0.740899	0.769927	1	2742	tags=27%, list=25%, signal=35%
PDGF_ERK_DN.V1_UP	88	0.189924	0.838677	0.756436	0.768373	1	3546	tags=42%, list=33%, signal=62%
EIF4E_DN	57	0.223143	0.775711	0.764933	0.854369	1	2729	tags=33%, list=25%, signal=44%
PRC2_EED_UP.V1_DN	113	0.199607	0.728355	0.768145	0.905253	1	1362	tags=15%, list=13%, signal=17%
BCAT_BILD_ET_AL_UP	28	0.238683	0.782119	0.770186	0.854805	1	3174	tags=46%, list=29%, signal=66%
E2F3_UP.V1_DN	74	0.1981	0.823701	0.781116	0.787169	1	2507	tags=27%, list=23%, signal=35%
HOXA9_DN.V1_DN	104	0.188794	0.776987	0.797244	0.85797	1	1152	tags=13%, list=11%, signal=14%
EIF4E_UP	59	0.204798	0.712263	0.816842	0.913967	1	931	tags=14%, list=9%, signal=15%
ERB2_UP.V1_UP	104	0.187106	0.740304	0.839104	0.900138	1	2761	tags=29%, list=25%, signal=38%
GLI1_UP.V1_DN	16	0.236881	0.720903	0.865462	0.908752	1	4202	tags=63%, list=39%, signal=102%
SIRNA_EIF4GI_DN	59	0.18896	0.69285	0.88499	0.924652	1	3400	tags=36%, list=31%, signal=52%
GCNP_SHH_UP_EARLY.V1_UP	99	0.183202	0.705706	0.889313	0.916354	1	3451	tags=32%, list=32%, signal=47%
P53_DN.V2_DN	77	0.184872	0.734714	0.916667	0.902251	1	1816	tags=19%, list=17%, signal=23%
BCAT_GDS748_UP	25	0.189078	0.610899	0.925253	0.969285	1	1991	tags=20%, list=18%, signal=24%
LTE2_UP.V1_UP	105	0.1592	0.682691	0.952569	0.929293	1	2747	tags=27%, list=25%, signal=35%
KRAS.BREAST_UP.V1_DN	75	0.175862	0.675922	0.966	0.92936	1	3170	tags=33%, list=29%, signal=47%

## Sheet: Low expression of STAT1
Table SIII. GSEA oncogenic signatures results. GSEA outcomes of the c6 (c6.all.v6.2.symbols.gmt) reference gene set for the key genes in the Janus kinase-signal transducer and activator of transcription signaling pathway in skin cutaneous melanoma. GSEA, gene set enrichment analysis. GSEA, gene set enrich analysis; ES, enrichment score; NES, normalized enrichment score; NOM, nominal; FDR, false d…
Name	Size	ES	NES	NOM P-value	FDR q-value	FWER p-value	Rank to max	Leading edge
KRAS.KIDNEY_UP.V1_UP	75	-0.350094	-1.38249	0.0645161	1	0.93	802	tags=23%, list=7%, signal=24%
BMI1_DN_MEL18_DN.V1_DN	81	-0.344472	-1.37644	0.0792079	1	0.933	1630	tags=30%, list=15%, signal=35%
BCAT_GDS748_DN	25	-0.378893	-1.32487	0.124514	1	0.966	1977	tags=36%, list=18%, signal=44%
BMI1_DN.V1_DN	81	-0.301566	-1.21243	0.183299	1	0.994	2188	tags=31%, list=20%, signal=38%
CAHOY_ASTROCYTIC	53	-0.312848	-1.17069	0.238004	1	0.998	1267	tags=23%, list=12%, signal=26%
MEL18_DN.V1_DN	90	-0.282422	-1.1388	0.242424	1	0.998	2188	tags=29%, list=20%, signal=36%
BRCA1_DN.V1_UP	62	-0.305129	-1.10943	0.287526	1	0.998	1753	tags=35%, list=16%, signal=42%
SIRNA_EIF4GI_UP	53	-0.275555	-1.08378	0.329545	1	0.999	2703	tags=38%, list=25%, signal=50%
ESC_V6.5_UP_LATE.V1_UP	109	-0.255774	-1.07958	0.305503	1	0.999	787	tags=16%, list=7%, signal=17%
P53_DN.V1_DN	114	-0.241357	-1.01963	0.403614	1	0.999	2232	tags=29%, list=21%, signal=36%
SRC_UP.V1_UP	80	-0.279324	-0.970453	0.490196	1	1	2012	tags=29%, list=19%, signal=35%
MTOR_UP.V1_DN	103	-0.22464	-0.94413	0.543278	1	1	2350	tags=28%, list=22%, signal=36%
GLI1_UP.V1_UP	21	-0.284105	-0.92276	0.578035	1	1	3104	tags=52%, list=29%, signal=73%
RAF_UP.V1_DN	116	-0.227114	-0.916598	0.56785	1	1	2461	tags=28%, list=23%, signal=36%
BCAT.100_UP.V1_DN	19	-0.300972	-0.908298	0.544231	1	1	1392	tags=21%, list=13%, signal=24%
BCAT_BILD_ET_AL_DN	29	-0.287601	-0.886216	0.588983	1	1	1780	tags=24%, list=16%, signal=29%
TGFB_UP.V1_DN	108	-0.192738	-0.856373	0.754352	1	1	2029	tags=23%, list=19%, signal=28%
MTOR_UP.N4.V1_DN	88	-0.221599	-0.852302	0.643312	1	1	1239	tags=19%, list=11%, signal=22%
CSR_EARLY_UP.V1_DN	74	-0.217049	-0.848692	0.669474	1	1	987	tags=15%, list=9%, signal=16%
RAF_UP.V1_UP	115	-0.191437	-0.797617	0.770021	1	1	2330	tags=26%, list=22%, signal=33%
E2F3_UP.V1_UP	99	-0.18366	-0.796389	0.792829	1	1	1153	tags=13%, list=11%, signal=15%
WNT_UP.V1_UP	112	-0.194665	-0.769824	0.861868	1	1	1928	tags=22%, list=18%, signal=27%
MYC_UP.V1_UP	91	-0.216709	-0.760722	0.742972	1	1	2193	tags=26%, list=20%, signal=33%
CAHOY_NEURONAL	54	-0.204686	-0.755251	0.881988	1	1	272	tags=9%, list=3%, signal=9%
RB_P130_DN.V1_UP	68	-0.204797	-0.753383	0.823529	1	1	3657	tags=40%, list=34%, signal=60%
BCAT.100_UP.V1_UP	27	-0.218584	-0.737288	0.844311	1	1	3161	tags=37%, list=29%, signal=52%
PRC2_EED_UP.V1_UP	105	-0.171245	-0.731606	0.936128	1	1	3095	tags=35%, list=29%, signal=49%
STK33_SKM_DN	137	-0.159854	-0.716429	0.954455	1	1	2111	tags=24%, list=19%, signal=30%
CSR_LATE_UP.V1_DN	87	-0.175361	-0.706705	0.911647	1	1	2647	tags=28%, list=24%, signal=36%
PDGF_UP.V1_UP	88	-0.16313	-0.694399	0.950884	0.996301	1	2055	tags=25%, list=19%, signal=31%
RAPA_EARLY_UP.V1_DN	109	-0.172585	-0.682616	0.950199	0.976726	1	2338	tags=24%, list=22%, signal=30%
AKT_UP.V1_DN	110	-0.154241	-0.635762	0.975143	0.986246	1	2421	tags=23%, list=22%, signal=29%
AKT_UP_MTOR_DN.V1_DN	112	-0.134078	-0.59269	0.998012	0.977907	1	2827	tags=26%, list=26%, signal=35%

## Sheet: High expression of STAT3
Table SIII. GSEA oncogenic signatures results. GSEA outcomes of the c6 (c6.all.v6.2.symbols.gmt) reference gene set for the key genes in the Janus kinase-signal transducer and activator of transcription signaling pathway in skin cutaneous melanoma. GSEA, gene set enrichment analysis. GSEA, gene set enrich analysis; ES, enrichment score; NES, normalized enrichment score; NOM, nominal; FDR, false d…
Name	Size	ES	NES	NOM P-value	FDR q-value	FWER p-value	Rank to max	Leading edge
MYC_UP.V1_UP	91	0.435918	1.5646	0.0536398	1	0.656	2821	tags=48%, list=26%, signal=65%
CYCLIN_D1_UP.V1_DN	101	0.313016	1.35346	0.0547368	1	0.941	1594	tags=23%, list=15%, signal=26%
KRAS.600_UP.V1_DN	157	0.376095	1.43985	0.0814196	1	0.872	2231	tags=37%, list=21%, signal=46%
P53_DN.V2_DN	77	0.328453	1.29823	0.0974155	1	0.967	2406	tags=32%, list=22%, signal=41%
PRC2_SUZ12_UP.V1_DN	102	0.327976	1.31099	0.0983607	1	0.962	2033	tags=32%, list=19%, signal=39%
KRAS.300_UP.V1_DN	83	0.382362	1.37123	0.100209	1	0.925	1666	tags=34%, list=15%, signal=40%
AKT_UP.V1_UP	104	0.320824	1.31088	0.108949	1	0.962	1688	tags=27%, list=16%, signal=32%
PRC1_BMI_UP.V1_DN	93	0.327558	1.28504	0.110187	1	0.97	2585	tags=39%, list=24%, signal=50%
ALK_DN.V1_DN	73	0.328435	1.28162	0.119284	1	0.972	2441	tags=38%, list=23%, signal=49%
KRAS.PROSTATE_UP.V1_DN	87	0.350246	1.31634	0.131631	1	0.961	2371	tags=37%, list=22%, signal=47%
DCA_UP.V1_DN	107	0.26302	1.195	0.14405	1	0.993	2901	tags=33%, list=27%, signal=44%
KRAS.LUNG.BREAST_UP.V1_DN	77	0.362476	1.30724	0.147239	1	0.963	2063	tags=34%, list=19%, signal=41%
STK33_DN	145	0.255248	1.19926	0.154	1	0.992	2440	tags=31%, list=23%, signal=40%
JAK2_DN.V1_UP	100	0.306031	1.22575	0.155136	1	0.99	1965	tags=32%, list=18%, signal=39%
PRC2_SUZ12_UP.V1_UP	105	0.282176	1.18772	0.178138	0.930498	0.993	2111	tags=30%, list=19%, signal=36%
CYCLIN_D1_KE_.V1_DN	97	0.305996	1.22245	0.180873	1	0.992	1382	tags=21%, list=13%, signal=23%
RAPA_EARLY_UP.V1_UP	104	0.290782	1.19413	0.182365	0.999112	0.993	1908	tags=22%, list=18%, signal=27%
KRAS.LUNG_UP.V1_DN	79	0.398729	1.32195	0.194154	1	0.96	1620	tags=32%, list=15%, signal=37%
IL15_UP.V1_DN	88	0.300489	1.18555	0.219008	0.896048	0.993	1003	tags=17%, list=9%, signal=19%
LEF1_UP.V1_DN	109	0.28772	1.19055	0.219917	0.963723	0.993	1039	tags=20%, list=10%, signal=22%
STK33_NOMO_DN	147	0.240451	1.12062	0.227459	0.818799	0.997	2440	tags=31%, list=23%, signal=39%
ESC_J1_UP_EARLY.V1_DN	113	0.265931	1.16105	0.228216	0.789028	0.994	2720	tags=38%, list=25%, signal=50%
EIF4E_UP	59	0.365539	1.24781	0.229885	1	0.986	2781	tags=44%, list=26%, signal=59%
KRAS.DF.V1_DN	109	0.284943	1.1634	0.240326	0.808554	0.994	1906	tags=27%, list=18%, signal=32%
TGFB_UP.V1_UP	105	0.304389	1.172	0.244306	0.874642	0.993	3241	tags=42%, list=30%, signal=59%
CAHOY_ASTROGLIAL	57	0.339078	1.1847	0.250505	0.860308	0.993	1296	tags=21%, list=12%, signal=24%
ESC_J1_UP_LATE.V1_DN	108	0.25511	1.12983	0.253438	0.814126	0.996	2900	tags=37%, list=27%, signal=50%
KRAS.50_UP.V1_DN	31	0.403579	1.20039	0.254167	1	0.992	1488	tags=35%, list=14%, signal=41%
ATM_DN.V1_DN	77	0.279997	1.09983	0.259036	0.840443	0.998	1242	tags=22%, list=11%, signal=25%
ESC_V6.5_UP_LATE.V1_DN	112	0.254024	1.13598	0.26	0.819394	0.996	1929	tags=24%, list=18%, signal=29%
ESC_J1_UP_EARLY.V1_UP	88	0.276923	1.13669	0.265263	0.844784	0.996	1861	tags=24%, list=17%, signal=29%
CRX_DN.V1_UP	75	0.258176	1.1064	0.266802	0.843191	0.998	1345	tags=19%, list=12%, signal=21%
SRC_UP.V1_UP	80	0.320444	1.16664	0.270876	0.826938	0.994	1879	tags=26%, list=17%, signal=32%
BCAT.100_UP.V1_DN	19	0.391643	1.16892	0.277228	0.851245	0.993	3466	tags=53%, list=32%, signal=77%
NRL_DN.V1_DN	69	0.260163	1.07953	0.318637	0.863854	0.998	1716	tags=23%, list=16%, signal=27%
KRAS.LUNG_UP.V1_UP	79	0.28383	1.08401	0.325956	0.87263	0.998	1430	tags=23%, list=13%, signal=26%
MTOR_UP.V1_UP	90	0.264051	1.07408	0.344196	0.85745	0.998	1969	tags=29%, list=18%, signal=35%
CRX_NRL_DN.V1_DN	63	0.262418	1.05454	0.34608	0.8559	0.999	1615	tags=22%, list=15%, signal=26%
PDGF_ERK_DN.V1_DN	83	0.278742	1.06173	0.364389	0.876667	0.999	2020	tags=24%, list=19%, signal=29%
P53_DN.V1_UP	110	0.284915	1.03496	0.369919	0.898709	1	1553	tags=22%, list=14%, signal=25%
E2F3_UP.V1_DN	74	0.254402	1.05481	0.371316	0.87697	0.999	3187	tags=39%, list=29%, signal=55%
PRC2_EZH2_UP.V1_DN	101	0.252557	1.03267	0.391304	0.884897	1	2722	tags=31%, list=25%, signal=41%
SRC_UP.V1_DN	93	0.244544	1.0273	0.4	0.882216	1	2977	tags=30%, list=27%, signal=41%
IL21_UP.V1_DN	96	0.251647	1.00899	0.410959	0.903893	1	2817	tags=36%, list=26%, signal=49%
NOTCH_DN.V1_UP	102	0.233585	0.99712	0.436	0.923567	1	1092	tags=17%, list=10%, signal=18%
IL21_UP.V1_UP	106	0.257917	1.01258	0.442589	0.911873	1	2467	tags=34%, list=23%, signal=44%
AKT_UP_MTOR_DN.V1_DN	112	0.220998	0.984676	0.463855	0.907259	1	1176	tags=17%, list=11%, signal=19%
RELA_DN.V1_DN	74	0.257515	0.99683	0.466527	0.904864	1	2145	tags=30%, list=20%, signal=37%
BCAT_GDS748_DN	25	0.27972	0.989392	0.469008	0.910244	1	1882	tags=20%, list=17%, signal=24%
VEGF_A_UP.V1_DN	118	0.272869	0.957558	0.473141	0.921172	1	2325	tags=27%, list=21%, signal=34%
JAK2_DN.V1_DN	73	0.256616	0.974047	0.480469	0.923536	1	2853	tags=33%, list=26%, signal=44%
NRL_DN.V1_UP	82	0.231206	0.966619	0.50625	0.9103	1	1834	tags=23%, list=17%, signal=28%
PTEN_DN.V2_DN	76	0.240922	0.969721	0.517787	0.918868	1	3190	tags=33%, list=29%, signal=46%
TGFB_UP.V1_DN	108	0.212907	0.952885	0.533469	0.919378	1	2950	tags=32%, list=27%, signal=44%
NOTCH_DN.V1_DN	95	0.239808	0.948772	0.53831	0.898811	1	1183	tags=18%, list=11%, signal=20%
STK33_SKM_DN	137	0.21008	0.952067	0.542	0.90515	1	3300	tags=36%, list=30%, signal=51%
KRAS.600.LUNG.BREAST_UP.V1_DN	145	0.227575	0.918489	0.561224	0.897432	1	2063	tags=26%, list=19%, signal=31%
RB_P107_DN.V1_DN	73	0.250508	0.925916	0.568401	0.905112	1	1191	tags=19%, list=11%, signal=21%
PTEN_DN.V1_DN	94	0.230462	0.934922	0.576305	0.924193	1	2202	tags=28%, list=20%, signal=34%
WNT_UP.V1_UP	112	0.231404	0.928055	0.577083	0.929339	1	2143	tags=25%, list=20%, signal=31%
ATM_DN.V1_UP	76	0.234081	0.922925	0.581162	0.898952	1	2670	tags=30%, list=25%, signal=40%
PIGF_UP.V1_UP	106	0.253555	0.847931	0.598394	0.929776	1	2926	tags=35%, list=27%, signal=47%
PIGF_UP.V1_DN	112	0.236306	0.926591	0.599165	0.918555	1	3038	tags=34%, list=28%, signal=47%
DCA_UP.V1_UP	95	0.221103	0.915513	0.605485	0.892283	1	1861	tags=21%, list=17%, signal=25%
ESC_V6.5_UP_EARLY.V1_UP	83	0.22478	0.90487	0.609705	0.907544	1	1969	tags=20%, list=18%, signal=25%
PRC2_EZH2_UP.V1_UP	111	0.231896	0.883476	0.616633	0.940342	1	1093	tags=17%, list=10%, signal=19%
TBK1.DF_DN	170	0.21431	0.815922	0.649694	0.900567	1	2790	tags=30%, list=26%, signal=40%
ERB2_UP.V1_UP	104	0.215968	0.868438	0.652008	0.93997	1	1710	tags=21%, list=16%, signal=25%
KRAS.AMP.LUNG_UP.V1_UP	76	0.225305	0.882099	0.668737	0.916525	1	2858	tags=30%, list=26%, signal=41%
CYCLIN_D1_UP.V1_UP	114	0.232878	0.84389	0.674747	0.915489	1	2376	tags=27%, list=22%, signal=34%
EGFR_UP.V1_DN	117	0.196899	0.883404	0.676647	0.926502	1	1796	tags=20%, list=17%, signal=23%
PRC2_EED_UP.V1_UP	105	0.207525	0.891685	0.685072	0.930557	1	2421	tags=26%, list=22%, signal=33%
BCAT_BILD_ET_AL_UP	28	0.264819	0.856497	0.690574	0.945374	1	3474	tags=43%, list=32%, signal=63%
AKT_UP_MTOR_DN.V1_UP	102	0.211993	0.849981	0.690945	0.937246	1	1897	tags=23%, list=18%, signal=27%
MEK_UP.V1_UP	117	0.205902	0.816161	0.692929	0.910995	1	1578	tags=18%, list=15%, signal=21%
KRAS.LUNG.BREAST_UP.V1_UP	77	0.231392	0.844719	0.696099	0.925487	1	1430	tags=19%, list=13%, signal=22%
GCNP_SHH_UP_EARLY.V1_UP	99	0.21439	0.822328	0.697856	0.91975	1	3218	tags=32%, list=30%, signal=46%
CSR_EARLY_UP.V1_DN	74	0.212978	0.823334	0.697917	0.929181	1	2062	tags=24%, list=19%, signal=30%
KRAS.600.LUNG.BREAST_UP.V1_UP	154	0.209174	0.867318	0.699203	0.929883	1	1430	tags=18%, list=13%, signal=21%
PRC1_BMI_UP.V1_UP	94	0.204494	0.856138	0.701863	0.933358	1	1191	tags=17%, list=11%, signal=19%
RELA_DN.V1_UP	84	0.208801	0.834283	0.720648	0.915197	1	1949	tags=23%, list=18%, signal=27%
ESC_V6.5_UP_LATE.V1_UP	109	0.202204	0.841846	0.728543	0.90863	1	2444	tags=24%, list=23%, signal=30%
RPS14_DN.V1_DN	106	0.204941	0.812347	0.729622	0.897526	1	2936	tags=31%, list=27%, signal=42%
LEF1_UP.V1_UP	112	0.19817	0.817307	0.74898	0.919523	1	1183	tags=15%, list=11%, signal=17%
CRX_NRL_DN.V1_UP	79	0.196282	0.806477	0.779874	0.898829	1	2746	tags=30%, list=25%, signal=40%
MTOR_UP.N4.V1_DN	88	0.203491	0.778197	0.781186	0.923167	1	3158	tags=30%, list=29%, signal=41%
RB_P130_DN.V1_UP	68	0.20463	0.772002	0.787819	0.924912	1	1905	tags=19%, list=18%, signal=23%
ERB2_UP.V1_DN	118	0.200955	0.683285	0.792683	1	1	3024	tags=29%, list=28%, signal=40%
RB_DN.V1_DN	64	0.208231	0.785962	0.795833	0.91839	1	2329	tags=30%, list=22%, signal=38%
ESC_V6.5_UP_EARLY.V1_DN	109	0.193834	0.769085	0.813665	0.919681	1	1290	tags=17%, list=12%, signal=19%
GLI1_UP.V1_DN	16	0.256788	0.759521	0.823413	0.925716	1	1578	tags=19%, list=15%, signal=22%
P53_DN.V2_UP	87	0.195067	0.745645	0.829959	0.939132	1	810	tags=13%, list=7%, signal=14%
PKCA_DN.V1_DN	92	0.18734	0.797964	0.841176	0.905955	1	1362	tags=16%, list=13%, signal=18%
PTEN_DN.V2_UP	77	0.192163	0.742867	0.875	0.933773	1	3182	tags=35%, list=29%, signal=49%
BMI1_DN.V1_UP	76	0.190777	0.673234	0.892495	0.983033	1	1664	tags=17%, list=15%, signal=20%
GCNP_SHH_UP_LATE.V1_DN	104	0.175061	0.659175	0.912317	0.985554	1	3027	tags=31%, list=28%, signal=42%
SIRNA_EIF4GI_UP	53	0.175296	0.678281	0.927342	0.998529	1	2454	tags=23%, list=23%, signal=29%
E2F1_UP.V1_UP	100	0.164516	0.632127	0.931452	0.98527	1	3388	tags=32%, list=31%, signal=46%
YAP1_DN	25	0.187021	0.635152	0.953815	0.993308	1	901	tags=12%, list=8%, signal=13%
CSR_EARLY_UP.V1_UP	92	0.15621	0.580962	0.96332	0.990857	1	3439	tags=30%, list=32%, signal=44%
RB_DN.V1_UP	74	0.162145	0.607024	0.966203	0.989613	1	2684	tags=22%, list=25%, signal=29%
JNK_DN.V1_UP	99	0.160194	0.674084	0.96701	0.992407	1	3358	tags=31%, list=31%, signal=45%
CSR_LATE_UP.V1_UP	102	0.141349	0.502086	0.990196	0.99618	1	3208	tags=24%, list=30%, signal=33%

## Sheet: Low expression of STAT3
Table SIII. GSEA oncogenic signatures results. GSEA outcomes of the c6 (c6.all.v6.2.symbols.gmt) reference gene set for the key genes in the Janus kinase-signal transducer and activator of transcription signaling pathway in skin cutaneous melanoma. GSEA, gene set enrichment analysis. GSEA, gene set enrich analysis; ES, enrichment score; NES, normalized enrichment score; NOM, nominal; FDR, false d…
Name	Size	ES	NES	NOM P-value	FDR q-value	FWER p-value	Rank to max	Leading edge
CSR_LATE_UP.V1_DN	87	-0.405093	-1.65812	0.00409836	0.398812	0.433	2221	tags=41%, list=21%, signal=52%
YAP1_UP	25	-0.45318	-1.61568	0.0220441	0.378397	0.517	1063	tags=24%, list=10%, signal=27%
HOXA9_DN.V1_UP	108	-0.401928	-1.59473	0.034	0.331884	0.558	2667	tags=43%, list=25%, signal=56%
RPS14_DN.V1_UP	105	-0.501633	-1.69888	0.0340909	0.564341	0.337	2632	tags=61%, list=24%, signal=80%
SIRNA_EIF4GI_DN	59	-0.425496	-1.56282	0.034413	0.33978	0.636	1801	tags=36%, list=17%, signal=42%
EIF4E_DN	57	-0.438658	-1.51157	0.0482897	0.406502	0.739	1894	tags=37%, list=17%, signal=44%
WNT_UP.V1_DN	99	-0.31777	-1.33989	0.0537428	0.610037	0.943	2177	tags=37%, list=20%, signal=46%
BCAT.100_UP.V1_UP	27	-0.419014	-1.3951	0.0685484	0.653134	0.906	2607	tags=48%, list=24%, signal=63%
SNF5_DN.V1_UP	106	-0.390363	-1.48844	0.0737864	0.41043	0.781	2004	tags=37%, list=19%, signal=45%
IL2_UP.V1_UP	110	-0.340809	-1.3572	0.0810277	0.598474	0.931	2347	tags=34%, list=22%, signal=43%
RAF_UP.V1_UP	115	-0.331743	-1.37081	0.0820611	0.675355	0.924	2526	tags=37%, list=23%, signal=47%
E2F1_UP.V1_DN	121	-0.31056	-1.32503	0.0924855	0.568811	0.952	2211	tags=33%, list=20%, signal=41%
KRAS.KIDNEY_UP.V1_UP	75	-0.341212	-1.32593	0.113772	0.609285	0.951	2113	tags=36%, list=20%, signal=44%
CORDENONSI_YAP_CONSERVED_SIGNATURE	38	-0.414533	-1.3648	0.12749	0.629051	0.927	1485	tags=29%, list=14%, signal=33%
MTOR_UP.N4.V1_UP	104	-0.298324	-1.27132	0.147117	0.658898	0.973	2323	tags=33%, list=21%, signal=41%
CAMP_UP.V1_DN	121	-0.319072	-1.30669	0.147705	0.586925	0.963	1901	tags=32%, list=18%, signal=39%
STK33_SKM_UP	147	-0.298866	-1.22354	0.192079	0.789316	0.991	2211	tags=33%, list=20%, signal=41%
MEL18_DN.V1_UP	73	-0.333988	-1.21412	0.224806	0.781405	0.991	2834	tags=40%, list=26%, signal=53%
BCAT_GDS748_UP	25	-0.365413	-1.19087	0.257606	0.825971	0.993	1775	tags=32%, list=16%, signal=38%
RB_P130_DN.V1_DN	81	-0.329394	-1.1835	0.257812	0.811296	0.994	1563	tags=30%, list=14%, signal=34%
EGFR_UP.V1_UP	114	-0.308329	-1.18036	0.269962	0.784888	0.995	2123	tags=36%, list=20%, signal=44%
NFE2L2.V2	250	-0.233118	-1.09033	0.287129	1	0.999	1391	tags=20%, list=13%, signal=23%
ATF2_UP.V1_UP	108	-0.256676	-1.08452	0.289421	1	0.999	1582	tags=21%, list=15%, signal=25%
PTEN_DN.V1_UP	99	-0.26746	-1.08804	0.335968	1	0.999	2284	tags=33%, list=21%, signal=42%
MTOR_UP.V1_DN	103	-0.248417	-1.06158	0.337864	1	1	1476	tags=20%, list=14%, signal=23%
JNK_DN.V1_DN	91	-0.25069	-1.05133	0.346	1	1	1680	tags=23%, list=16%, signal=27%
BRCA1_DN.V1_UP	62	-0.290119	-1.04834	0.364729	0.989489	1	2452	tags=39%, list=23%, signal=50%
LTE2_UP.V1_DN	118	-0.271271	-1.0576	0.365759	1	1	2296	tags=32%, list=21%, signal=40%
BMI1_DN.V1_DN	81	-0.257639	-1.04908	0.36692	1	1	2848	tags=43%, list=26%, signal=58%
PDGF_UP.V1_DN	75	-0.268005	-1.04665	0.374753	0.962423	1	2003	tags=31%, list=18%, signal=37%
ATF2_S_UP.V1_UP	97	-0.235664	-1.02689	0.391753	0.942325	1	1709	tags=24%, list=16%, signal=28%
CAHOY_ASTROCYTIC	53	-0.27098	-1.02789	0.395582	0.999405	1	1619	tags=30%, list=15%, signal=35%
KRAS.300_UP.V1_UP	81	-0.261769	-1.02578	0.406615	0.917897	1	2003	tags=31%, list=18%, signal=38%
STK33_NOMO_UP	142	-0.262905	-1.01723	0.425891	0.894599	1	2214	tags=27%, list=20%, signal=34%
CTIP_DN.V1_DN	72	-0.262576	-1.02752	0.428298	0.969483	1	709	tags=17%, list=7%, signal=18%
BCAT_BILD_ET_AL_DN	29	-0.343234	-1.02361	0.43074	0.899191	1	1839	tags=28%, list=17%, signal=33%
LTE2_UP.V1_UP	105	-0.238219	-1.01597	0.431102	0.874352	1	2297	tags=30%, list=21%, signal=37%
IL15_UP.V1_UP	101	-0.250462	-1.01114	0.4334	0.843923	1	2347	tags=32%, list=22%, signal=40%
KRAS.BREAST_UP.V1_UP	68	-0.277282	-1.01336	0.433476	0.859467	1	1552	tags=29%, list=14%, signal=34%
PDGF_UP.V1_UP	88	-0.230207	-0.997403	0.437247	0.84323	1	1932	tags=26%, list=18%, signal=32%
TBK1.DN.48HRS_UP	28	-0.277545	-0.985871	0.440404	0.783837	1	1842	tags=29%, list=17%, signal=34%
ATF2_S_UP.V1_DN	108	-0.245886	-0.994579	0.463277	0.812227	1	1638	tags=24%, list=15%, signal=28%
ALK_DN.V1_UP	73	-0.263122	-0.996139	0.464981	0.827046	1	2907	tags=42%, list=27%, signal=58%
CTIP_DN.V1_UP	71	-0.25961	-1.00363	0.465116	0.844514	1	2589	tags=38%, list=24%, signal=50%
BMI1_DN_MEL18_DN.V1_DN	81	-0.247665	-0.98855	0.473786	0.811484	1	2075	tags=31%, list=19%, signal=38%
STK33_UP	144	-0.253398	-0.988502	0.477444	0.793705	1	2125	tags=28%, list=20%, signal=35%
GCNP_SHH_UP_EARLY.V1_DN	100	-0.216841	-0.983596	0.483034	0.774018	1	1838	tags=27%, list=17%, signal=32%
GLI1_UP.V1_UP	21	-0.294925	-0.968277	0.487903	0.799192	1	2405	tags=33%, list=22%, signal=43%
RAF_UP.V1_DN	116	-0.230531	-0.939191	0.498969	0.754067	1	2243	tags=28%, list=21%, signal=34%
P53_DN.V1_DN	114	-0.230014	-0.939773	0.509395	0.766444	1	2177	tags=26%, list=20%, signal=33%
ESC_J1_UP_LATE.V1_UP	112	-0.237747	-0.964054	0.509804	0.793621	1	1385	tags=21%, list=13%, signal=23%
MYC_UP.V1_DN	93	-0.241676	-0.958344	0.515504	0.792468	1	2187	tags=31%, list=20%, signal=39%
VEGF_A_UP.V1_UP	110	-0.249702	-0.947731	0.524	0.760552	1	2710	tags=39%, list=25%, signal=52%
PKCA_DN.V1_UP	82	-0.253082	-0.952349	0.533333	0.777774	1	2163	tags=33%, list=20%, signal=41%
CAHOY_NEURONAL	54	-0.255158	-0.95356	0.536	0.789924	1	998	tags=15%, list=9%, signal=16%
CAHOY_OLIGODENDROCUTIC	55	-0.240451	-0.948314	0.542744	0.773434	1	2634	tags=36%, list=24%, signal=48%
KRAS.KIDNEY_UP.V1_DN	75	-0.251561	-0.933904	0.547667	0.753704	1	1924	tags=29%, list=18%, signal=35%
HOXA9_DN.V1_DN	104	-0.218302	-0.910715	0.579399	0.796397	1	1234	tags=16%, list=11%, signal=18%
CAMP_UP.V1_UP	114	-0.205324	-0.878216	0.607803	0.833693	1	1714	tags=18%, list=16%, signal=22%
MEL18_DN.V1_DN	90	-0.228166	-0.893829	0.615679	0.810498	1	2270	tags=31%, list=21%, signal=39%
SNF5_DN.V1_DN	97	-0.219342	-0.903116	0.664717	0.801535	1	2267	tags=29%, list=21%, signal=36%
E2F3_UP.V1_UP	99	-0.202415	-0.871176	0.665323	0.824429	1	1761	tags=19%, list=16%, signal=23%
KRAS.600_UP.V1_UP	153	-0.203317	-0.871377	0.711155	0.837126	1	2045	tags=27%, list=19%, signal=33%
KRAS.AMP.LUNG_UP.V1_DN	71	-0.214086	-0.825779	0.751953	0.918094	1	2504	tags=32%, list=23%, signal=42%
KRAS.DF.V1_UP	123	-0.199453	-0.799336	0.754491	0.921777	1	2306	tags=30%, list=21%, signal=38%
MEK_UP.V1_DN	115	-0.20093	-0.779858	0.758555	0.921189	1	2270	tags=27%, list=21%, signal=34%
ATF2_UP.V1_DN	100	-0.201106	-0.811903	0.77176	0.922282	1	2375	tags=31%, list=22%, signal=39%
RAPA_EARLY_UP.V1_DN	109	-0.197457	-0.793902	0.798817	0.906681	1	1574	tags=21%, list=15%, signal=24%
KRAS.BREAST_UP.V1_DN	75	-0.212512	-0.795337	0.814583	0.916779	1	2037	tags=28%, list=19%, signal=34%
KRAS.50_UP.V1_UP	27	-0.237428	-0.768159	0.822	0.928836	1	1940	tags=30%, list=18%, signal=36%
PRC2_EED_UP.V1_DN	113	-0.188607	-0.690559	0.822709	0.956363	1	2351	tags=27%, list=22%, signal=34%
CYCLIN_D1_KE_.V1_UP	113	-0.196434	-0.762783	0.823529	0.913763	1	1942	tags=23%, list=18%, signal=28%
PDGF_ERK_DN.V1_UP	88	-0.185842	-0.817209	0.837022	0.923908	1	1743	tags=18%, list=16%, signal=21%
CRX_DN.V1_DN	86	-0.192208	-0.804842	0.847328	0.923405	1	2561	tags=31%, list=24%, signal=41%
IL2_UP.V1_DN	94	-0.192763	-0.758472	0.852883	0.909339	1	2258	tags=24%, list=21%, signal=31%
TBK1.DF_UP	147	-0.166275	-0.766525	0.870588	0.919137	1	1380	tags=15%, list=13%, signal=17%
KRAS.PROSTATE_UP.V1_UP	71	-0.182855	-0.72584	0.889105	0.936499	1	3407	tags=44%, list=31%, signal=63%
RB_P107_DN.V1_UP	87	-0.178774	-0.604158	0.896341	0.984026	1	2880	tags=30%, list=27%, signal=40%
BRCA1_DN.V1_DN	70	-0.184118	-0.74582	0.898305	0.917888	1	1802	tags=23%, list=17%, signal=27%
BMI1_DN_MEL18_DN.V1_UP	72	-0.177951	-0.636471	0.917466	0.99114	1	3017	tags=35%, list=28%, signal=48%
AKT_UP.V1_DN	110	-0.174644	-0.723411	0.926004	0.927995	1	928	tags=11%, list=9%, signal=12%
GCNP_SHH_UP_LATE.V1_UP	104	-0.163936	-0.607761	0.926295	0.994457	1	1932	tags=21%, list=18%, signal=26%
TBK1.DN.48HRS_DN	29	-0.155612	-0.552886	0.982422	0.988995	1	3459	tags=38%, list=32%, signal=56%

## Sheet: High expression of STAT4
Table SIII. GSEA oncogenic signatures results. GSEA outcomes of the c6 (c6.all.v6.2.symbols.gmt) reference gene set for the key genes in the Janus kinase-signal transducer and activator of transcription signaling pathway in skin cutaneous melanoma. GSEA, gene set enrichment analysis. GSEA, gene set enrich analysis; ES, enrichment score; NES, normalized enrichment score; NOM, nominal; FDR, false d…
Name	Size	ES	NES	NOM P-value	FDR q-value	FWER p-value	Rank to max	Leading edge
YAP1_DN	25	0.444685	1.50759	0.0394477	1	0.764	2656	tags=48%, list=25%, signal=63%
MYC_UP.V1_UP	91	0.406095	1.47237	0.0882353	1	0.814	1722	tags=36%, list=16%, signal=43%
RPS14_DN.V1_DN	106	0.335075	1.3538	0.121331	1	0.95	2451	tags=37%, list=23%, signal=47%
CSR_LATE_UP.V1_UP	102	0.37564	1.36593	0.142857	1	0.939	2091	tags=33%, list=19%, signal=41%
IL15_UP.V1_UP	101	0.324279	1.28591	0.144309	1	0.98	2508	tags=40%, list=23%, signal=51%
BCAT_BILD_ET_AL_UP	28	0.386335	1.25322	0.159136	1	0.984	1880	tags=29%, list=17%, signal=34%
CYCLIN_D1_KE_.V1_UP	113	0.328651	1.27298	0.159919	1	0.98	2058	tags=34%, list=19%, signal=41%
RAPA_EARLY_UP.V1_DN	109	0.303229	1.22287	0.173828	1	0.989	1401	tags=23%, list=13%, signal=26%
NRL_DN.V1_DN	69	0.279256	1.19151	0.174664	1	0.993	1697	tags=22%, list=16%, signal=26%
RB_P107_DN.V1_DN	73	0.334087	1.24489	0.216634	1	0.985	1757	tags=30%, list=16%, signal=36%
AKT_UP_MTOR_DN.V1_UP	102	0.291598	1.1845	0.229412	1	0.996	2605	tags=37%, list=24%, signal=49%
BMI1_DN.V1_UP	76	0.326692	1.15341	0.264591	1	0.996	2196	tags=32%, list=20%, signal=39%
NOTCH_DN.V1_UP	102	0.267164	1.11363	0.270161	1	0.997	2879	tags=36%, list=27%, signal=49%
PDGF_UP.V1_UP	88	0.257314	1.12523	0.270321	1	0.997	2536	tags=34%, list=23%, signal=44%
EIF4E_UP	59	0.329421	1.1351	0.293204	1	0.997	2619	tags=39%, list=24%, signal=51%
PDGF_ERK_DN.V1_DN	83	0.30439	1.12613	0.300813	1	0.997	1567	tags=27%, list=14%, signal=31%
BCAT_GDS748_UP	25	0.34919	1.12449	0.304951	1	0.997	1694	tags=36%, list=16%, signal=43%
DCA_UP.V1_DN	107	0.240358	1.06988	0.313492	1	0.999	2552	tags=30%, list=24%, signal=39%
KRAS.KIDNEY_UP.V1_DN	75	0.288155	1.09289	0.316929	1	0.999	965	tags=17%, list=9%, signal=19%
IL2_UP.V1_UP	110	0.272998	1.08114	0.316973	1	0.999	2508	tags=34%, list=23%, signal=43%
CRX_DN.V1_DN	86	0.263524	1.08772	0.319018	1	0.999	2134	tags=29%, list=20%, signal=36%
PKCA_DN.V1_DN	92	0.250202	1.07111	0.327766	1	0.999	2197	tags=25%, list=20%, signal=31%
RB_P107_DN.V1_UP	87	0.32321	1.10524	0.342324	1	0.997	2806	tags=38%, list=26%, signal=51%
PRC2_EED_UP.V1_DN	113	0.301739	1.07767	0.359596	1	0.999	3215	tags=42%, list=30%, signal=59%
ESC_V6.5_UP_EARLY.V1_UP	83	0.270802	1.07265	0.361868	1	0.999	1629	tags=24%, list=15%, signal=28%
PDGF_UP.V1_DN	75	0.267767	1.06546	0.362745	1	0.999	2375	tags=31%, list=22%, signal=39%
PRC2_EZH2_UP.V1_DN	101	0.260514	1.06132	0.373444	1	0.999	1285	tags=22%, list=12%, signal=24%
CRX_NRL_DN.V1_DN	63	0.260382	1.05048	0.373737	1	0.999	3167	tags=38%, list=29%, signal=54%
ESC_J1_UP_EARLY.V1_DN	113	0.23953	1.03152	0.377823	1	1	2367	tags=28%, list=22%, signal=36%
SIRNA_EIF4GI_DN	59	0.286774	1.04064	0.403579	1	1	2461	tags=34%, list=23%, signal=44%
ESC_V6.5_UP_EARLY.V1_DN	109	0.253466	1.00577	0.436105	1	1	2319	tags=26%, list=21%, signal=32%
ATM_DN.V1_DN	77	0.248863	0.985473	0.47448	1	1	1624	tags=22%, list=15%, signal=26%
TBK1.DN.48HRS_DN	29	0.277885	0.977686	0.476562	1	1	2245	tags=31%, list=21%, signal=39%
ATM_DN.V1_UP	76	0.247796	0.968548	0.497087	1	1	1519	tags=21%, list=14%, signal=24%
WNT_UP.V1_UP	112	0.235011	0.951199	0.514563	1	1	1965	tags=24%, list=18%, signal=29%
ATF2_S_UP.V1_DN	108	0.229502	0.935665	0.534137	1	1	1576	tags=20%, list=15%, signal=24%
ESC_V6.5_UP_LATE.V1_DN	112	0.215175	0.948074	0.540755	1	1	1255	tags=17%, list=12%, signal=19%
AKT_UP.V1_UP	104	0.221207	0.925577	0.555556	1	1	2750	tags=33%, list=25%, signal=43%
NFE2L2.V2	250	0.202515	0.955335	0.561886	1	1	1855	tags=21%, list=17%, signal=25%
IL21_UP.V1_UP	106	0.231589	0.918886	0.56405	1	1	2423	tags=34%, list=22%, signal=43%
E2F1_UP.V1_UP	100	0.240283	0.911241	0.566337	1	1	2344	tags=26%, list=22%, signal=33%
CAHOY_ASTROGLIAL	57	0.257781	0.901904	0.582031	1	1	2431	tags=33%, list=22%, signal=43%
ATF2_S_UP.V1_UP	97	0.215374	0.933274	0.583658	1	1	2324	tags=27%, list=21%, signal=34%
CAHOY_OLIGODENDROCUTIC	55	0.237067	0.904007	0.593684	1	1	1427	tags=20%, list=13%, signal=23%
HOXA9_DN.V1_DN	104	0.21742	0.908131	0.597917	1	1	2222	tags=27%, list=21%, signal=34%
CRX_DN.V1_UP	75	0.212032	0.91991	0.61245	1	1	2220	tags=31%, list=21%, signal=38%
PRC2_EZH2_UP.V1_UP	111	0.222041	0.881191	0.613726	1	1	2514	tags=31%, list=23%, signal=39%
JNK_DN.V1_UP	99	0.220744	0.925776	0.614341	1	1	3205	tags=37%, list=30%, signal=53%
EGFR_UP.V1_UP	114	0.227349	0.854571	0.621569	0.977535	1	2545	tags=30%, list=24%, signal=39%
TBK1.DN.48HRS_UP	28	0.254298	0.871806	0.630648	1	1	2680	tags=36%, list=25%, signal=47%
GCNP_SHH_UP_LATE.V1_DN	104	0.231936	0.870688	0.630952	1	1	2090	tags=26%, list=19%, signal=32%
KRAS.LUNG_UP.V1_UP	79	0.232099	0.897634	0.632812	1	1	2325	tags=32%, list=21%, signal=40%
E2F3_UP.V1_DN	74	0.215362	0.903566	0.633721	1	1	2765	tags=32%, list=26%, signal=43%
CYCLIN_D1_UP.V1_UP	114	0.248154	0.878066	0.640082	1	1	2563	tags=34%, list=24%, signal=44%
RB_P130_DN.V1_UP	68	0.23253	0.863038	0.649798	1	1	3008	tags=35%, list=28%, signal=49%
RB_DN.V1_DN	64	0.227038	0.862665	0.654321	1	1	2852	tags=34%, list=26%, signal=46%
ESC_J1_UP_LATE.V1_UP	112	0.209467	0.860215	0.658153	0.996257	1	2510	tags=29%, list=23%, signal=37%
MTOR_UP.V1_UP	90	0.217433	0.881886	0.672098	1	1	1440	tags=18%, list=13%, signal=20%
RELA_DN.V1_DN	74	0.220217	0.860062	0.6875	0.979914	1	1317	tags=18%, list=12%, signal=20%
ERB2_UP.V1_UP	104	0.215155	0.861142	0.697446	1	1	2638	tags=31%, list=24%, signal=40%
VEGF_A_UP.V1_DN	118	0.209834	0.755448	0.716832	1	1	2711	tags=29%, list=25%, signal=38%
GCNP_SHH_UP_EARLY.V1_DN	100	0.193022	0.872003	0.736111	1	1	1883	tags=20%, list=17%, signal=24%
PRC1_BMI_UP.V1_DN	93	0.208787	0.839132	0.741617	1	1	1764	tags=22%, list=16%, signal=25%
CAMP_UP.V1_UP	114	0.184961	0.78262	0.780156	1	1	2387	tags=25%, list=22%, signal=32%
CORDENONSI_YAP_CONSERVED_SIGNATURE	38	0.218856	0.749548	0.793241	1	1	2700	tags=34%, list=25%, signal=45%
MYC_UP.V1_DN	93	0.195791	0.793603	0.814961	1	1	1064	tags=15%, list=10%, signal=17%
KRAS.600.LUNG.BREAST_UP.V1_UP	154	0.193492	0.804197	0.817491	1	1	2694	tags=34%, list=25%, signal=45%
KRAS.600_UP.V1_DN	157	0.194987	0.751235	0.82205	1	1	1603	tags=20%, list=15%, signal=23%
BMI1_DN_MEL18_DN.V1_UP	72	0.203127	0.720258	0.826172	1	1	2236	tags=25%, list=21%, signal=31%
KRAS.DF.V1_UP	123	0.181013	0.731395	0.842942	1	1	2503	tags=28%, list=23%, signal=36%
CYCLIN_D1_UP.V1_DN	101	0.182249	0.789208	0.846307	1	1	3203	tags=37%, list=30%, signal=52%
P53_DN.V2_UP	87	0.191843	0.728373	0.851504	1	1	2932	tags=33%, list=27%, signal=45%
TBK1.DF_UP	147	0.170967	0.775883	0.856031	1	1	2462	tags=26%, list=23%, signal=33%
MTOR_UP.N4.V1_UP	104	0.176112	0.743165	0.870229	1	1	2641	tags=26%, list=24%, signal=34%
JNK_DN.V1_DN	91	0.181373	0.745866	0.896341	1	1	3155	tags=36%, list=29%, signal=51%
PIGF_UP.V1_DN	112	0.181001	0.700413	0.910569	1	1	3195	tags=35%, list=30%, signal=49%
MEL18_DN.V1_UP	73	0.179194	0.657185	0.91502	1	1	3264	tags=34%, list=30%, signal=49%
TGFB_UP.V1_UP	105	0.17197	0.677407	0.918164	1	1	2646	tags=27%, list=24%, signal=35%
E2F1_UP.V1_DN	121	0.170715	0.716363	0.921971	1	1	2246	tags=23%, list=21%, signal=29%
PRC2_SUZ12_UP.V1_UP	105	0.169891	0.715871	0.922594	1	1	2066	tags=23%, list=19%, signal=28%
KRAS.BREAST_UP.V1_UP	68	0.192821	0.709641	0.927419	1	1	3190	tags=41%, list=29%, signal=58%
CSR_EARLY_UP.V1_UP	92	0.164943	0.632189	0.938492	1	1	2693	tags=26%, list=25%, signal=34%
RB_DN.V1_UP	74	0.166126	0.628167	0.940945	0.992512	1	4031	tags=43%, list=37%, signal=68%
LEF1_UP.V1_UP	112	0.160966	0.665866	0.941532	1	1	2123	tags=21%, list=20%, signal=26%
PTEN_DN.V2_UP	77	0.176599	0.669267	0.947475	1	1	1922	tags=22%, list=18%, signal=27%
PTEN_DN.V1_DN	94	0.169475	0.675527	0.964143	1	1	2218	tags=28%, list=20%, signal=34%
ATF2_UP.V1_DN	100	0.157964	0.636021	0.976744	1	1	1987	tags=19%, list=18%, signal=23%
ESC_J1_UP_LATE.V1_DN	108	0.146953	0.653651	0.985972	1	1	2367	tags=23%, list=22%, signal=29%
P53_DN.V1_DN	114	0.141903	0.575749	0.987629	0.994025	1	3365	tags=39%, list=31%, signal=55%
GLI1_UP.V1_DN	16	0.140223	0.426038	0.993988	0.999487	1	4110	tags=50%, list=38%, signal=80%
MEK_UP.V1_UP	117	0.147568	0.586048	1	1	1	1653	tags=16%, list=15%, signal=19%

## Sheet: Low expression of STAT4
Table SIII. GSEA oncogenic signatures results. GSEA outcomes of the c6 (c6.all.v6.2.symbols.gmt) reference gene set for the key genes in the Janus kinase-signal transducer and activator of transcription signaling pathway in skin cutaneous melanoma. GSEA, gene set enrichment analysis. GSEA, gene set enrich analysis; ES, enrichment score; NES, normalized enrichment score; NOM, nominal; FDR, false d…
Name	Size	ES	NES	NOM P-value	FDR q-value	FWER p-value	Rank to max	Leading edge
BCAT_GDS748_DN	25	-0.518629	-1.77707	0.00604839	0.308751	0.204	3108	tags=56%, list=29%, signal=78%
RAF_UP.V1_UP	115	-0.352679	-1.45241	0.0482897	1	0.843	2438	tags=35%, list=23%, signal=44%
BRCA1_DN.V1_UP	62	-0.385451	-1.40546	0.0506823	1	0.9	2755	tags=47%, list=25%, signal=62%
JAK2_DN.V1_DN	73	-0.337553	-1.28421	0.14902	1	0.976	1359	tags=25%, list=13%, signal=28%
PRC1_BMI_UP.V1_UP	94	-0.28103	-1.18926	0.168932	1	0.997	2312	tags=27%, list=21%, signal=34%
MTOR_UP.N4.V1_DN	88	-0.324138	-1.26687	0.197628	1	0.979	3282	tags=39%, list=30%, signal=55%
CSR_EARLY_UP.V1_DN	74	-0.307805	-1.1927	0.213439	1	0.996	2261	tags=27%, list=21%, signal=34%
MTOR_UP.V1_DN	103	-0.278018	-1.17105	0.222	1	0.997	2817	tags=33%, list=26%, signal=44%
CYCLIN_D1_KE_.V1_DN	97	-0.289127	-1.16612	0.228	1	0.997	2163	tags=28%, list=20%, signal=34%
BCAT_BILD_ET_AL_DN	29	-0.406105	-1.21583	0.247082	1	0.993	3408	tags=41%, list=31%, signal=60%
PRC2_EED_UP.V1_UP	105	-0.260431	-1.12793	0.254902	1	1	2076	tags=26%, list=19%, signal=32%
P53_DN.V2_DN	77	-0.281351	-1.12748	0.27381	1	1	1623	tags=21%, list=15%, signal=24%
KRAS.KIDNEY_UP.V1_UP	75	-0.288222	-1.1248	0.286573	1	1	2800	tags=31%, list=26%, signal=41%
IL15_UP.V1_DN	88	-0.279415	-1.12395	0.290061	1	1	1953	tags=27%, list=18%, signal=33%
JAK2_DN.V1_UP	100	-0.283335	-1.111	0.297619	1	1	2468	tags=31%, list=23%, signal=40%
STK33_SKM_DN	137	-0.235859	-1.07371	0.304781	1	1	3614	tags=42%, list=33%, signal=62%
BCAT.100_UP.V1_UP	27	-0.325905	-1.09915	0.322134	1	1	1391	tags=22%, list=13%, signal=25%
CAHOY_NEURONAL	54	-0.279132	-1.05908	0.346392	1	1	1638	tags=26%, list=15%, signal=30%
CTIP_DN.V1_UP	71	-0.27628	-1.07346	0.35119	1	1	2468	tags=35%, list=23%, signal=45%
NRL_DN.V1_UP	82	-0.254726	-1.06129	0.362903	1	1	3422	tags=39%, list=32%, signal=57%
PTEN_DN.V2_DN	76	-0.261549	-1.04219	0.39521	1	1	2812	tags=33%, list=26%, signal=44%
KRAS.600.LUNG.BREAST_UP.V1_DN	145	-0.262794	-1.03775	0.403614	1	1	2706	tags=31%, list=25%, signal=41%
ALK_DN.V1_DN	73	-0.260645	-1.00899	0.423077	1	1	3249	tags=40%, list=30%, signal=56%
STK33_UP	144	-0.265789	-1.02373	0.430255	1	1	2766	tags=35%, list=26%, signal=47%
BCAT.100_UP.V1_DN	19	-0.345736	-1.02053	0.431412	1	1	2397	tags=32%, list=22%, signal=40%
GLI1_UP.V1_UP	21	-0.304216	-1.00512	0.446184	1	1	2941	tags=43%, list=27%, signal=59%
LTE2_UP.V1_UP	105	-0.232886	-1.0017	0.450304	1	1	3169	tags=35%, list=29%, signal=49%
KRAS.BREAST_UP.V1_DN	75	-0.264334	-0.992454	0.451546	1	1	2706	tags=31%, list=25%, signal=41%
RAF_UP.V1_DN	116	-0.241667	-0.994338	0.468813	1	1	2158	tags=23%, list=20%, signal=29%
PDGF_ERK_DN.V1_UP	88	-0.22421	-0.978595	0.474542	1	1	2396	tags=27%, list=22%, signal=35%
STK33_NOMO_UP	142	-0.260713	-0.970706	0.503068	1	1	2030	tags=27%, list=19%, signal=33%
KRAS.AMP.LUNG_UP.V1_UP	76	-0.246544	-0.94716	0.522449	1	1	2521	tags=33%, list=23%, signal=43%
KRAS.PROSTATE_UP.V1_UP	71	-0.235517	-0.936821	0.52505	1	1	2930	tags=32%, list=27%, signal=44%
ATF2_UP.V1_UP	108	-0.227275	-0.959195	0.526523	1	1	2597	tags=27%, list=24%, signal=35%
YAP1_UP	25	-0.270711	-0.94422	0.528713	1	1	1392	tags=20%, list=13%, signal=23%
NOTCH_DN.V1_DN	95	-0.243258	-0.958804	0.532653	1	1	2250	tags=26%, list=21%, signal=33%
GCNP_SHH_UP_EARLY.V1_UP	99	-0.241453	-0.931607	0.539683	1	1	1753	tags=22%, list=16%, signal=26%
CAHOY_ASTROCYTIC	53	-0.253676	-0.938136	0.546025	1	1	2471	tags=32%, list=23%, signal=41%
SRC_UP.V1_UP	80	-0.252461	-0.917984	0.551724	1	1	1963	tags=25%, list=18%, signal=30%
PTEN_DN.V1_UP	99	-0.223932	-0.926872	0.566532	1	1	2935	tags=30%, list=27%, signal=41%
EIF4E_DN	57	-0.263097	-0.90175	0.580122	1	1	2832	tags=30%, list=26%, signal=40%
STK33_DN	145	-0.201259	-0.945905	0.590909	1	1	2105	tags=23%, list=19%, signal=28%
DCA_UP.V1_UP	95	-0.221501	-0.917228	0.591633	1	1	1285	tags=16%, list=12%, signal=18%
IL21_UP.V1_DN	96	-0.233003	-0.921976	0.592292	1	1	2545	tags=29%, list=24%, signal=38%
KRAS.300_UP.V1_DN	83	-0.253443	-0.894158	0.61167	1	1	1835	tags=23%, list=17%, signal=27%
ERB2_UP.V1_DN	118	-0.242697	-0.832776	0.617647	1	1	3786	tags=43%, list=35%, signal=66%
SRC_UP.V1_DN	93	-0.207727	-0.892481	0.618661	1	1	2594	tags=32%, list=24%, signal=42%
MEL18_DN.V1_DN	90	-0.226268	-0.894404	0.623327	1	1	2450	tags=27%, list=23%, signal=34%
SIRNA_EIF4GI_UP	53	-0.231005	-0.902141	0.626506	1	1	1304	tags=17%, list=12%, signal=19%
KRAS.50_UP.V1_UP	27	-0.269704	-0.876023	0.636917	1	1	1021	tags=19%, list=9%, signal=20%
PRC2_SUZ12_UP.V1_DN	102	-0.220639	-0.866254	0.65625	1	1	1944	tags=24%, list=18%, signal=28%
KRAS.300_UP.V1_UP	81	-0.221588	-0.854566	0.669371	1	1	1623	tags=17%, list=15%, signal=20%
SNF5_DN.V1_DN	97	-0.218101	-0.896105	0.674464	1	1	2710	tags=32%, list=25%, signal=42%
CTIP_DN.V1_DN	72	-0.216554	-0.86354	0.677932	1	1	3011	tags=33%, list=28%, signal=46%
KRAS.LUNG_UP.V1_DN	79	-0.241496	-0.788333	0.683673	1	1	542	tags=14%, list=5%, signal=15%
TGFB_UP.V1_DN	108	-0.199191	-0.889427	0.685598	1	1	1857	tags=19%, list=17%, signal=23%
RELA_DN.V1_UP	84	-0.218159	-0.862315	0.692929	1	1	1954	tags=23%, list=18%, signal=27%
WNT_UP.V1_DN	99	-0.202438	-0.8636	0.696498	1	1	1876	tags=22%, list=17%, signal=27%
AKT_UP_MTOR_DN.V1_DN	112	-0.193219	-0.866434	0.699612	1	1	2796	tags=28%, list=26%, signal=37%
EGFR_UP.V1_DN	117	-0.194674	-0.880016	0.705653	1	1	2158	tags=21%, list=20%, signal=25%
STK33_SKM_UP	147	-0.197205	-0.808703	0.740365	1	1	2791	tags=30%, list=26%, signal=40%
HOXA9_DN.V1_UP	108	-0.210134	-0.789453	0.741803	1	1	2154	tags=22%, list=20%, signal=27%
TBK1.DF_DN	170	-0.206591	-0.778743	0.748996	1	1	2094	tags=21%, list=19%, signal=26%
KRAS.LUNG.BREAST_UP.V1_UP	77	-0.211767	-0.787234	0.768595	1	1	2678	tags=29%, list=25%, signal=38%
ESC_V6.5_UP_LATE.V1_UP	109	-0.200651	-0.827424	0.773305	1	1	2513	tags=25%, list=23%, signal=32%
STK33_NOMO_DN	147	-0.175671	-0.840976	0.774451	1	1	2105	tags=21%, list=19%, signal=26%
ALK_DN.V1_UP	73	-0.208139	-0.785934	0.786885	1	1	2166	tags=25%, list=20%, signal=31%
KRAS.600_UP.V1_UP	153	-0.192721	-0.818508	0.788	1	1	2443	tags=25%, list=23%, signal=32%
P53_DN.V1_UP	110	-0.199767	-0.721577	0.815534	1	1	2072	tags=24%, list=19%, signal=29%
RPS14_DN.V1_UP	105	-0.191767	-0.64119	0.824351	1	1	2582	tags=26%, list=24%, signal=33%
BMI1_DN.V1_DN	81	-0.197179	-0.802159	0.82659	1	1	3119	tags=32%, list=29%, signal=45%
MEK_UP.V1_DN	115	-0.192435	-0.7475	0.838446	1	1	2414	tags=23%, list=22%, signal=29%
SNF5_DN.V1_UP	106	-0.180462	-0.702137	0.844182	1	1	1040	tags=11%, list=10%, signal=12%
KRAS.50_UP.V1_DN	31	-0.232939	-0.680303	0.855967	1	1	1416	tags=19%, list=13%, signal=22%
BRCA1_DN.V1_DN	70	-0.187483	-0.768874	0.8577	1	1	2382	tags=24%, list=22%, signal=31%
ESC_J1_UP_EARLY.V1_UP	88	-0.186539	-0.781181	0.858038	1	1	2559	tags=28%, list=24%, signal=37%
AKT_UP.V1_DN	110	-0.181368	-0.75388	0.867735	1	1	2666	tags=25%, list=25%, signal=32%
BMI1_DN_MEL18_DN.V1_DN	81	-0.184268	-0.732454	0.872255	1	1	3735	tags=40%, list=34%, signal=60%
CRX_NRL_DN.V1_UP	79	-0.182435	-0.741334	0.879917	1	1	3332	tags=35%, list=31%, signal=51%
LEF1_UP.V1_DN	109	-0.178565	-0.752543	0.884462	1	1	1486	tags=15%, list=14%, signal=17%
GCNP_SHH_UP_LATE.V1_UP	104	-0.179335	-0.659906	0.889535	1	1	3025	tags=29%, list=28%, signal=40%
KRAS.LUNG.BREAST_UP.V1_DN	77	-0.197454	-0.69365	0.894845	1	1	2706	tags=29%, list=25%, signal=38%
CSR_LATE_UP.V1_DN	87	-0.171092	-0.71676	0.899803	1	1	542	tags=9%, list=5%, signal=10%
IL2_UP.V1_DN	94	-0.184848	-0.737664	0.905544	1	1	2786	tags=27%, list=26%, signal=35%
PIGF_UP.V1_UP	106	-0.16763	-0.557411	0.917671	0.997996	1	2809	tags=25%, list=26%, signal=34%
KRAS.DF.V1_DN	109	-0.169163	-0.687335	0.924335	1	1	1024	tags=12%, list=9%, signal=13%
E2F3_UP.V1_UP	99	-0.164483	-0.704492	0.929293	1	1	1714	tags=16%, list=16%, signal=19%
RAPA_EARLY_UP.V1_UP	104	-0.177757	-0.718723	0.937255	1	1	1963	tags=18%, list=18%, signal=22%
VEGF_A_UP.V1_UP	110	-0.174836	-0.682248	0.945205	1	1	1898	tags=18%, list=18%, signal=22%
LTE2_UP.V1_DN	118	-0.158739	-0.615341	0.955375	0.997834	1	2489	tags=21%, list=23%, signal=27%
KRAS.PROSTATE_UP.V1_DN	87	-0.167969	-0.630954	0.965164	1	1	1835	tags=17%, list=17%, signal=21%
RB_P130_DN.V1_DN	81	-0.162129	-0.582424	0.966135	1	1	3348	tags=28%, list=31%, signal=41%
PKCA_DN.V1_UP	82	-0.171523	-0.662206	0.970954	1	1	3098	tags=29%, list=29%, signal=41%
KRAS.AMP.LUNG_UP.V1_DN	71	-0.162315	-0.624905	0.9875	1	1	3390	tags=32%, list=31%, signal=47%
CAMP_UP.V1_DN	121	-0.128467	-0.534512	0.996063	0.992203	1	2566	tags=20%, list=24%, signal=26%

## Sheet: High expression of STAT5B
Table SIII. GSEA oncogenic signatures results. GSEA outcomes of the c6 (c6.all.v6.2.symbols.gmt) reference gene set for the key genes in the Janus kinase-signal transducer and activator of transcription signaling pathway in skin cutaneous melanoma. GSEA, gene set enrichment analysis. GSEA, gene set enrich analysis; ES, enrichment score; NES, normalized enrichment score; NOM, nominal; FDR, false d…
Name	Size	ES	NES	NOM P-value	FDR q-value	FWER p-value	Rank to max	Leading edge
NOTCH_DN.V1_DN	95	0.429618	1.6885	0.00403226	0.310681	0.38	2042	tags=33%, list=19%, signal=40%
RPS14_DN.V1_DN	106	0.435519	1.78862	0.00410678	0.328759	0.18	1505	tags=30%, list=14%, signal=35%
PDGF_ERK_DN.V1_DN	83	0.459297	1.71571	0.00618557	0.364651	0.323	2861	tags=47%, list=26%, signal=63%
TGFB_UP.V1_UP	105	0.431895	1.67368	0.0117878	0.266641	0.421	2051	tags=37%, list=19%, signal=45%
RB_DN.V1_UP	74	0.437796	1.65104	0.0118812	0.260863	0.465	2725	tags=41%, list=25%, signal=54%
E2F3_UP.V1_DN	74	0.370257	1.51077	0.0186722	0.383491	0.761	2727	tags=41%, list=25%, signal=54%
PRC2_EZH2_UP.V1_DN	101	0.38819	1.61065	0.0309917	0.298941	0.548	2220	tags=34%, list=21%, signal=42%
RAPA_EARLY_UP.V1_DN	109	0.373842	1.49043	0.0341365	0.360775	0.784	2242	tags=35%, list=21%, signal=44%
HOXA9_DN.V1_DN	104	0.375049	1.56739	0.0378947	0.322129	0.647	2319	tags=36%, list=21%, signal=45%
CSR_EARLY_UP.V1_UP	92	0.415742	1.57691	0.043659	0.346192	0.635	2342	tags=37%, list=22%, signal=47%
JNK_DN.V1_UP	99	0.331798	1.41804	0.0479846	0.46234	0.89	3901	tags=48%, list=36%, signal=75%
ALK_DN.V1_DN	73	0.375991	1.45024	0.0528455	0.433944	0.848	2348	tags=34%, list=22%, signal=43%
PKCA_DN.V1_DN	92	0.316634	1.37365	0.0534979	0.504127	0.929	2111	tags=30%, list=19%, signal=37%
PRC2_EED_UP.V1_DN	113	0.413953	1.50096	0.0570265	0.368312	0.771	2306	tags=42%, list=21%, signal=53%
ESC_J1_UP_EARLY.V1_UP	88	0.342498	1.39433	0.0571992	0.474645	0.916	2533	tags=34%, list=23%, signal=44%
RB_P107_DN.V1_UP	87	0.439788	1.51132	0.0821355	0.424792	0.761	2270	tags=44%, list=21%, signal=55%
E2F3_UP.V1_UP	99	0.304597	1.3277	0.0885312	0.533765	0.956	3477	tags=44%, list=32%, signal=65%
GLI1_UP.V1_UP	21	0.404843	1.36858	0.0948617	0.491069	0.935	854	tags=24%, list=8%, signal=26%
CYCLIN_D1_KE_.V1_UP	113	0.35145	1.36379	0.0965795	0.478135	0.936	1717	tags=27%, list=16%, signal=32%
CYCLIN_D1_UP.V1_DN	101	0.299712	1.29151	0.108481	0.590868	0.97	1431	tags=21%, list=13%, signal=24%
MYC_UP.V1_UP	91	0.389435	1.39739	0.109312	0.4971	0.913	2115	tags=36%, list=20%, signal=45%
CSR_LATE_UP.V1_UP	102	0.388372	1.4497	0.112224	0.404419	0.849	2821	tags=37%, list=26%, signal=50%
NRL_DN.V1_DN	69	0.298911	1.26333	0.118896	0.605104	0.984	1884	tags=23%, list=17%, signal=28%
PTEN_DN.V2_UP	77	0.351418	1.31653	0.119588	0.542221	0.958	3003	tags=44%, list=28%, signal=61%
E2F1_UP.V1_UP	100	0.347932	1.34688	0.125	0.502251	0.947	1985	tags=32%, list=18%, signal=39%
PIGF_UP.V1_DN	112	0.33327	1.28298	0.137931	0.591859	0.972	1925	tags=29%, list=18%, signal=35%
ESC_J1_UP_LATE.V1_DN	108	0.280037	1.24042	0.140206	0.633908	0.987	1528	tags=21%, list=14%, signal=25%
RB_P130_DN.V1_UP	68	0.339269	1.27381	0.150101	0.596128	0.976	2860	tags=41%, list=26%, signal=56%
CYCLIN_D1_UP.V1_UP	114	0.344686	1.24545	0.184615	0.64109	0.985	1738	tags=26%, list=16%, signal=31%
MYC_UP.V1_DN	93	0.295337	1.17338	0.217039	0.810875	0.995	2132	tags=29%, list=20%, signal=36%
ATF2_S_UP.V1_UP	97	0.268015	1.14102	0.221774	0.828565	0.998	2817	tags=34%, list=26%, signal=46%
YAP1_DN	25	0.351323	1.19068	0.240404	0.772808	0.995	3056	tags=48%, list=28%, signal=67%
PRC2_SUZ12_UP.V1_DN	102	0.293772	1.16307	0.240816	0.797802	0.995	2211	tags=28%, list=20%, signal=35%
STK33_NOMO_DN	147	0.238543	1.12378	0.242604	0.819864	0.999	2715	tags=30%, list=25%, signal=39%
SRC_UP.V1_DN	93	0.266321	1.12764	0.243478	0.850765	0.999	2176	tags=29%, list=20%, signal=36%
AKT_UP_MTOR_DN.V1_UP	102	0.290102	1.1684	0.245509	0.80315	0.995	2861	tags=35%, list=26%, signal=48%
KRAS.DF.V1_DN	109	0.282479	1.14149	0.247505	0.851471	0.998	1619	tags=23%, list=15%, signal=27%
ESC_V6.5_UP_EARLY.V1_DN	109	0.283351	1.12378	0.296371	0.84198	0.999	2985	tags=37%, list=28%, signal=50%
JNK_DN.V1_DN	91	0.256676	1.09501	0.302	0.852734	0.999	2574	tags=31%, list=24%, signal=40%
LEF1_UP.V1_UP	112	0.264316	1.10207	0.306796	0.849248	0.999	1601	tags=21%, list=15%, signal=24%
BMI1_DN.V1_UP	76	0.316641	1.11188	0.315369	0.83815	0.999	2631	tags=33%, list=24%, signal=43%
PDGF_UP.V1_UP	88	0.254114	1.09341	0.315574	0.83853	0.999	2106	tags=27%, list=19%, signal=34%
DCA_UP.V1_UP	95	0.263987	1.08331	0.31875	0.851257	0.999	1944	tags=28%, list=18%, signal=34%
AKT_UP.V1_UP	104	0.261773	1.0808	0.320158	0.840681	0.999	2756	tags=29%, list=25%, signal=38%
ESC_V6.5_UP_EARLY.V1_UP	83	0.267406	1.07566	0.321569	0.839923	1	1115	tags=16%, list=10%, signal=17%
ATF2_UP.V1_UP	108	0.255217	1.0701	0.327273	0.804617	1	2711	tags=33%, list=25%, signal=44%
WNT_UP.V1_UP	112	0.269607	1.07415	0.348606	0.826706	1	2978	tags=32%, list=28%, signal=44%
PTEN_DN.V2_DN	76	0.267058	1.07238	0.352705	0.814498	1	2710	tags=28%, list=25%, signal=37%
PRC1_BMI_UP.V1_DN	93	0.263589	1.04378	0.374245	0.872139	1	3286	tags=40%, list=30%, signal=57%
STK33_DN	145	0.216495	1.01727	0.398	0.905341	1	3459	tags=38%, list=32%, signal=55%
RAPA_EARLY_UP.V1_UP	104	0.24935	1.01916	0.409867	0.91736	1	2790	tags=34%, list=26%, signal=45%
MTOR_UP.V1_UP	90	0.251111	1.01971	0.419417	0.933904	1	2695	tags=28%, list=25%, signal=37%
RAF_UP.V1_DN	116	0.24253	0.995587	0.434185	0.960676	1	2434	tags=26%, list=22%, signal=33%
MEK_UP.V1_UP	117	0.248023	0.97996	0.456107	0.962189	1	2544	tags=32%, list=23%, signal=41%
BCAT.100_UP.V1_UP	27	0.29531	0.994272	0.461248	0.947457	1	3097	tags=44%, list=29%, signal=62%
CRX_NRL_DN.V1_UP	79	0.243259	0.990681	0.461538	0.942943	1	1992	tags=27%, list=18%, signal=32%
IL21_UP.V1_UP	106	0.245134	0.971031	0.482759	0.95859	1	3892	tags=49%, list=36%, signal=76%
P53_DN.V1_UP	110	0.271947	0.976471	0.5	0.955838	1	1481	tags=21%, list=14%, signal=24%
IL15_UP.V1_UP	101	0.239823	0.955371	0.510684	0.97852	1	3759	tags=48%, list=35%, signal=72%
GCNP_SHH_UP_EARLY.V1_UP	99	0.240365	0.93016	0.519588	1	1	1372	tags=19%, list=13%, signal=22%
ESC_V6.5_UP_LATE.V1_UP	109	0.232497	0.954494	0.522954	0.965325	1	3337	tags=36%, list=31%, signal=51%
BMI1_DN_MEL18_DN.V1_UP	72	0.268676	0.955773	0.525458	0.993868	1	4117	tags=46%, list=38%, signal=73%
EGFR_UP.V1_DN	117	0.215591	0.952877	0.529175	0.955198	1	988	tags=14%, list=9%, signal=15%
P53_DN.V2_DN	77	0.231205	0.925447	0.580392	1	1	2798	tags=35%, list=26%, signal=47%
IL21_UP.V1_DN	96	0.229211	0.9223	0.594059	1	1	2318	tags=24%, list=21%, signal=30%
ESC_J1_UP_EARLY.V1_DN	113	0.213672	0.912717	0.597585	1	1	2895	tags=31%, list=27%, signal=42%
SNF5_DN.V1_DN	97	0.22564	0.90826	0.608782	1	1	2126	tags=23%, list=20%, signal=28%
JAK2_DN.V1_UP	100	0.229962	0.907946	0.61	1	1	1602	tags=20%, list=15%, signal=23%
KRAS.LUNG_UP.V1_DN	79	0.259363	0.835468	0.611002	1	1	2765	tags=37%, list=26%, signal=49%
NRL_DN.V1_UP	82	0.220431	0.907556	0.611227	0.995313	1	1955	tags=24%, list=18%, signal=30%
PRC2_SUZ12_UP.V1_UP	105	0.217789	0.89568	0.623327	0.988443	1	2630	tags=30%, list=24%, signal=39%
DCA_UP.V1_DN	107	0.202254	0.906567	0.638672	0.984277	1	3143	tags=32%, list=29%, signal=44%
BCAT.100_UP.V1_DN	19	0.292071	0.861344	0.641584	1	1	779	tags=16%, list=7%, signal=17%
PRC1_BMI_UP.V1_UP	94	0.21819	0.902462	0.64741	0.982577	1	3019	tags=29%, list=28%, signal=39%
KRAS.LUNG_UP.V1_UP	79	0.224207	0.865242	0.663265	1	1	2188	tags=24%, list=20%, signal=30%
IL2_UP.V1_DN	94	0.216914	0.864911	0.670611	1	1	2313	tags=26%, list=21%, signal=32%
ESC_V6.5_UP_LATE.V1_DN	112	0.198945	0.892297	0.681725	0.985003	1	1528	tags=16%, list=14%, signal=19%
GCNP_SHH_UP_LATE.V1_DN	104	0.222666	0.835347	0.686654	1	1	1646	tags=18%, list=15%, signal=21%
PRC2_EZH2_UP.V1_UP	111	0.203537	0.800118	0.713996	1	1	2633	tags=28%, list=24%, signal=37%
JAK2_DN.V1_DN	73	0.213224	0.788038	0.720682	1	1	2343	tags=27%, list=22%, signal=35%
BCAT_BILD_ET_AL_UP	28	0.251636	0.809242	0.733463	1	1	2544	tags=32%, list=23%, signal=42%
BRCA1_DN.V1_DN	70	0.208996	0.843025	0.733728	1	1	2511	tags=27%, list=23%, signal=35%
BCAT_GDS748_UP	25	0.243442	0.790219	0.747475	1	1	1261	tags=16%, list=12%, signal=18%
CYCLIN_D1_KE_.V1_DN	97	0.208051	0.817034	0.748454	1	1	1247	tags=13%, list=12%, signal=15%
NOTCH_DN.V1_UP	102	0.200784	0.837686	0.754167	1	1	3377	tags=33%, list=31%, signal=48%
RB_DN.V1_DN	64	0.217798	0.804783	0.756335	1	1	3131	tags=36%, list=29%, signal=50%
KRAS.BREAST_UP.V1_UP	68	0.230583	0.833121	0.763779	1	1	2980	tags=35%, list=28%, signal=48%
RELA_DN.V1_UP	84	0.202453	0.80297	0.771134	1	1	3286	tags=37%, list=30%, signal=53%
CAMP_UP.V1_DN	121	0.185451	0.787409	0.790514	1	1	3493	tags=32%, list=32%, signal=47%
PTEN_DN.V1_DN	94	0.196344	0.795998	0.828	1	1	2836	tags=30%, list=26%, signal=40%
RB_P107_DN.V1_DN	73	0.194356	0.739019	0.840226	1	1	2757	tags=30%, list=25%, signal=40%
CORDENONSI_YAP_CONSERVED_SIGNATURE	38	0.206962	0.70992	0.842213	1	1	1536	tags=16%, list=14%, signal=18%
ATM_DN.V1_UP	76	0.198321	0.77971	0.844898	1	1	2959	tags=29%, list=27%, signal=40%
KRAS.600_UP.V1_DN	157	0.192605	0.718324	0.858025	1	1	2763	tags=29%, list=26%, signal=38%
SRC_UP.V1_UP	80	0.197317	0.711951	0.862136	1	1	2490	tags=25%, list=23%, signal=32%
ATM_DN.V1_DN	77	0.194473	0.765185	0.866	1	1	3116	tags=35%, list=29%, signal=49%
VEGF_A_UP.V1_DN	118	0.176519	0.648294	0.884937	1	1	1119	tags=13%, list=10%, signal=14%
ATF2_UP.V1_DN	100	0.182711	0.753474	0.885149	1	1	2053	tags=21%, list=19%, signal=26%
NFE2L2.V2	250	0.171295	0.800125	0.900794	1	1	1709	tags=17%, list=16%, signal=19%
CRX_DN.V1_DN	86	0.17533	0.725481	0.910931	1	1	2059	tags=22%, list=19%, signal=27%
TBK1.DN.48HRS_UP	28	0.195259	0.673632	0.913386	1	1	1179	tags=11%, list=11%, signal=12%
IL2_UP.V1_UP	110	0.176129	0.704852	0.914583	1	1	3759	tags=40%, list=35%, signal=61%
EIF4E_UP	59	0.180501	0.622372	0.921154	1	1	3271	tags=32%, list=30%, signal=46%
CAHOY_ASTROGLIAL	57	0.188214	0.642667	0.926214	1	1	2450	tags=25%, list=23%, signal=32%
MTOR_UP.N4.V1_UP	104	0.157131	0.664979	0.949896	1	1	2442	tags=22%, list=23%, signal=28%
KRAS.600.LUNG.BREAST_UP.V1_UP	154	0.166643	0.694555	0.953061	1	1	2537	tags=25%, list=23%, signal=32%
KRAS.300_UP.V1_DN	83	0.182457	0.632966	0.954092	1	1	2205	tags=22%, list=20%, signal=27%
CTIP_DN.V1_UP	71	0.177431	0.692595	0.954545	1	1	3643	tags=38%, list=34%, signal=57%
AKT_UP.V1_DN	110	0.165875	0.68269	0.962818	1	1	2662	tags=25%, list=25%, signal=32%
MEL18_DN.V1_DN	90	0.167482	0.659077	0.968504	1	1	2181	tags=22%, list=20%, signal=28%
KRAS.PROSTATE_UP.V1_DN	87	0.159554	0.584983	0.972746	1	1	2831	tags=28%, list=26%, signal=37%
PKCA_DN.V1_UP	82	0.174349	0.662124	0.974308	1	1	2249	tags=21%, list=21%, signal=26%
STK33_SKM_DN	137	0.153489	0.686572	0.979036	1	1	3019	tags=26%, list=28%, signal=36%
KRAS.AMP.LUNG_UP.V1_DN	71	0.166337	0.636094	0.981519	1	1	2925	tags=25%, list=27%, signal=35%
KRAS.LUNG.BREAST_UP.V1_DN	77	0.164029	0.568807	0.981744	1	1	2984	tags=30%, list=28%, signal=41%
KRAS.PROSTATE_UP.V1_UP	71	0.153318	0.607327	0.981964	1	1	3584	tags=35%, list=33%, signal=52%
P53_DN.V2_UP	87	0.154595	0.590877	0.982072	1	1	3688	tags=38%, list=34%, signal=57%
CAHOY_ASTROCYTIC	53	0.166272	0.614651	0.982387	1	1	2483	tags=21%, list=23%, signal=27%
BMI1_DN_MEL18_DN.V1_DN	81	0.157402	0.621732	0.984762	1	1	3736	tags=37%, list=35%, signal=56%
BMI1_DN.V1_DN	81	0.158169	0.632105	0.988142	1	1	2351	tags=23%, list=22%, signal=30%
MEL18_DN.V1_UP	73	0.147882	0.544934	0.992233	0.99858	1	3923	tags=38%, list=36%, signal=60%
RELA_DN.V1_DN	74	0.142092	0.547645	0.993939	1	1	3493	tags=32%, list=32%, signal=48%
KRAS.50_UP.V1_DN	31	0.155543	0.446247	0.995927	0.998946	1	3833	tags=39%, list=35%, signal=60%

## Sheet: Low expression of STAT5B
Table SIII. GSEA oncogenic signatures results. GSEA outcomes of the c6 (c6.all.v6.2.symbols.gmt) reference gene set for the key genes in the Janus kinase-signal transducer and activator of transcription signaling pathway in skin cutaneous melanoma. GSEA, gene set enrichment analysis. GSEA, gene set enrich analysis; ES, enrichment score; NES, normalized enrichment score; NOM, nominal; FDR, false d…
Name	Size	ES	NES	NOM P-value	FDR q-value	FWER p-value	Rank to max	Leading edge
STK33_NOMO_UP	142	-0.395194	-1.50622	0.0480962	1	0.768	2337	tags=38%, list=22%, signal=48%
LTE2_UP.V1_UP	105	-0.306503	-1.34563	0.0874525	1	0.953	1893	tags=27%, list=17%, signal=32%
HOXA9_DN.V1_UP	108	-0.372894	-1.42693	0.0881148	1	0.888	2192	tags=33%, list=20%, signal=41%
EIF4E_DN	57	-0.409989	-1.42591	0.0950495	1	0.891	2651	tags=42%, list=24%, signal=55%
P53_DN.V1_DN	114	-0.307199	-1.26871	0.118712	1	0.986	2869	tags=39%, list=26%, signal=53%
KRAS.AMP.LUNG_UP.V1_UP	76	-0.337444	-1.30122	0.122	1	0.979	1309	tags=24%, list=12%, signal=27%
STK33_UP	144	-0.319404	-1.24596	0.172414	1	0.99	2301	tags=31%, list=21%, signal=39%
GCNP_SHH_UP_EARLY.V1_DN	100	-0.259516	-1.16588	0.186613	1	0.995	2060	tags=27%, list=19%, signal=33%
CSR_EARLY_UP.V1_DN	74	-0.324471	-1.24279	0.192079	1	0.99	1553	tags=27%, list=14%, signal=31%
RPS14_DN.V1_UP	105	-0.389947	-1.2957	0.203156	1	0.98	2481	tags=41%, list=23%, signal=53%
STK33_SKM_UP	147	-0.284836	-1.17611	0.237643	1	0.995	2332	tags=29%, list=22%, signal=37%
RB_P130_DN.V1_DN	81	-0.310204	-1.12575	0.311412	1	0.998	2446	tags=40%, list=23%, signal=51%
LEF1_UP.V1_DN	109	-0.25171	-1.07268	0.323045	1	0.999	1507	tags=20%, list=14%, signal=23%
YAP1_UP	25	-0.303512	-1.0627	0.376782	1	0.999	3157	tags=44%, list=29%, signal=62%
CRX_DN.V1_UP	75	-0.241364	-1.04872	0.394251	1	0.999	2022	tags=25%, list=19%, signal=31%
GLI1_UP.V1_DN	16	-0.345806	-1.04474	0.403071	1	0.999	2698	tags=44%, list=25%, signal=58%
RAF_UP.V1_UP	115	-0.248517	-1.03379	0.409736	1	0.999	1893	tags=26%, list=17%, signal=31%
BCAT_BILD_ET_AL_DN	29	-0.353926	-1.05077	0.420432	1	0.999	2972	tags=48%, list=27%, signal=66%
PDGF_ERK_DN.V1_UP	88	-0.22609	-1.0012	0.427767	1	1	2854	tags=35%, list=26%, signal=47%
KRAS.BREAST_UP.V1_DN	75	-0.264935	-1.0056	0.437624	1	1	2438	tags=35%, list=23%, signal=44%
BCAT_GDS748_DN	25	-0.297111	-1.00385	0.443983	1	1	3418	tags=40%, list=32%, signal=58%
SIRNA_EIF4GI_DN	59	-0.273678	-0.999985	0.464217	1	1	1116	tags=19%, list=10%, signal=21%
PIGF_UP.V1_UP	106	-0.303458	-0.997205	0.465385	1	1	3177	tags=39%, list=29%, signal=54%
AKT_UP_MTOR_DN.V1_DN	112	-0.219689	-0.988436	0.468992	1	1	2963	tags=34%, list=27%, signal=46%
MTOR_UP.N4.V1_DN	88	-0.251302	-0.958992	0.516899	1	1	1869	tags=23%, list=17%, signal=27%
ATF2_S_UP.V1_DN	108	-0.23038	-0.928551	0.537074	1	1	2886	tags=39%, list=27%, signal=52%
MEK_UP.V1_DN	115	-0.236129	-0.908186	0.571721	1	1	2183	tags=26%, list=20%, signal=32%
LTE2_UP.V1_DN	118	-0.223911	-0.888423	0.582205	1	1	1890	tags=23%, list=17%, signal=27%
EGFR_UP.V1_UP	114	-0.235197	-0.887648	0.601643	1	1	1908	tags=28%, list=18%, signal=34%
TBK1.DN.48HRS_DN	29	-0.258128	-0.910534	0.607767	1	1	2060	tags=34%, list=19%, signal=42%
ERB2_UP.V1_DN	118	-0.257669	-0.859533	0.611111	1	1	3560	tags=46%, list=33%, signal=67%
CRX_NRL_DN.V1_DN	63	-0.223356	-0.904022	0.636697	1	1	1449	tags=19%, list=13%, signal=22%
WNT_UP.V1_DN	99	-0.212658	-0.895125	0.637827	1	1	1969	tags=24%, list=18%, signal=29%
IL15_UP.V1_DN	88	-0.22064	-0.872088	0.650406	1	1	2209	tags=26%, list=20%, signal=33%
KRAS.50_UP.V1_UP	27	-0.258142	-0.847629	0.671727	1	1	3916	tags=44%, list=36%, signal=69%
KRAS.KIDNEY_UP.V1_DN	75	-0.228207	-0.851668	0.689243	1	1	2681	tags=37%, list=25%, signal=49%
TBK1.DF_UP	147	-0.187932	-0.877159	0.697154	1	1	1962	tags=22%, list=18%, signal=27%
TBK1.DF_DN	170	-0.210815	-0.791447	0.713733	1	1	1262	tags=18%, list=12%, signal=20%
KRAS.600_UP.V1_UP	153	-0.203464	-0.8708	0.72447	1	1	2274	tags=26%, list=21%, signal=33%
ERB2_UP.V1_UP	104	-0.206628	-0.81302	0.734607	1	1	1548	tags=21%, list=14%, signal=24%
BRCA1_DN.V1_UP	62	-0.234323	-0.850026	0.737044	1	1	2123	tags=29%, list=20%, signal=36%
TGFB_UP.V1_DN	108	-0.191712	-0.84905	0.740443	1	1	2385	tags=28%, list=22%, signal=35%
CAHOY_OLIGODENDROCUTIC	55	-0.208276	-0.811602	0.748062	1	1	2893	tags=31%, list=27%, signal=42%
KRAS.600.LUNG.BREAST_UP.V1_DN	145	-0.196111	-0.7872	0.80754	1	1	2018	tags=21%, list=19%, signal=26%
MTOR_UP.V1_DN	103	-0.181116	-0.765816	0.854	1	1	1796	tags=20%, list=17%, signal=24%
PTEN_DN.V1_UP	99	-0.180207	-0.735967	0.875	1	1	1737	tags=20%, list=16%, signal=24%
CAMP_UP.V1_UP	114	-0.170377	-0.728004	0.890946	1	1	2264	tags=25%, list=21%, signal=32%
GCNP_SHH_UP_LATE.V1_UP	104	-0.179006	-0.662533	0.891013	1	1	1171	tags=13%, list=11%, signal=15%
KRAS.300_UP.V1_UP	81	-0.18386	-0.716983	0.891683	1	1	721	tags=9%, list=7%, signal=9%
VEGF_A_UP.V1_UP	110	-0.178717	-0.676195	0.89852	1	1	2636	tags=30%, list=24%, signal=39%
SNF5_DN.V1_UP	106	-0.165862	-0.633736	0.902534	1	1	3194	tags=37%, list=29%, signal=52%
PDGF_UP.V1_DN	75	-0.180899	-0.708347	0.921371	1	1	1884	tags=20%, list=17%, signal=24%
CSR_LATE_UP.V1_DN	87	-0.169406	-0.696375	0.922269	1	1	2844	tags=32%, list=26%, signal=43%
KRAS.LUNG.BREAST_UP.V1_UP	77	-0.180896	-0.674107	0.931641	1	1	572	tags=8%, list=5%, signal=8%
ESC_J1_UP_LATE.V1_UP	112	-0.162871	-0.649177	0.952282	1	1	1628	tags=17%, list=15%, signal=20%
KRAS.KIDNEY_UP.V1_UP	75	-0.167697	-0.642017	0.952675	1	1	1418	tags=13%, list=13%, signal=15%
PRC2_EED_UP.V1_UP	105	-0.160247	-0.686622	0.95858	1	1	2364	tags=26%, list=22%, signal=33%
ALK_DN.V1_UP	73	-0.169758	-0.641686	0.958743	1	1	2282	tags=25%, list=21%, signal=31%
SIRNA_EIF4GI_UP	53	-0.167256	-0.644735	0.962963	1	1	1548	tags=15%, list=14%, signal=18%
CTIP_DN.V1_DN	72	-0.16504	-0.655596	0.967245	1	1	1804	tags=17%, list=17%, signal=20%
CAHOY_NEURONAL	54	-0.164239	-0.607147	0.974806	1	1	871	tags=11%, list=8%, signal=12%
KRAS.DF.V1_UP	123	-0.144647	-0.577414	0.990403	0.981896	1	1935	tags=19%, list=18%, signal=23%
E2F1_UP.V1_DN	121	-0.136137	-0.585577	0.995902	0.99508	1	1987	tags=17%, list=18%, signal=21%

## Sheet: High expression of STAT6
Table SIII. GSEA oncogenic signatures results. GSEA outcomes of the c6 (c6.all.v6.2.symbols.gmt) reference gene set for the key genes in the Janus kinase-signal transducer and activator of transcription signaling pathway in skin cutaneous melanoma. GSEA, gene set enrichment analysis. GSEA, gene set enrich analysis; ES, enrichment score; NES, normalized enrichment score; NOM, nominal; FDR, false d…
Name	Size	ES	NES	NOM P-value	FDR q-value	FWER p-value	Rank to max	Leading edge
EIF4E_UP	59	-0.417194	-1.46831	0.0819367	1	0.821	3404	tags=47%, list=31%, signal=69%
BCAT_GDS748_DN	25	-0.391358	-1.354	0.0914397	1	0.937	2792	tags=48%, list=26%, signal=65%
TBK1.DN.48HRS_DN	29	-0.38916	-1.37473	0.0930233	1	0.928	1749	tags=24%, list=16%, signal=29%
PRC1_BMI_UP.V1_DN	93	-0.329158	-1.32434	0.0981964	1	0.956	2868	tags=40%, list=26%, signal=54%
ESC_J1_UP_EARLY.V1_UP	88	-0.314908	-1.30702	0.108607	1	0.966	2796	tags=34%, list=26%, signal=46%
BMI1_DN.V1_DN	81	-0.301873	-1.23004	0.134969	1	0.991	3554	tags=47%, list=33%, signal=69%
AKT_UP.V1_UP	104	-0.297679	-1.24736	0.15098	1	0.987	1655	tags=24%, list=15%, signal=28%
PTEN_DN.V2_UP	77	-0.330505	-1.26677	0.157676	1	0.981	3676	tags=47%, list=34%, signal=70%
BCAT.100_UP.V1_UP	27	-0.362614	-1.20873	0.195876	1	0.996	2927	tags=48%, list=27%, signal=66%
SRC_UP.V1_UP	80	-0.332612	-1.21694	0.226378	1	0.993	1934	tags=28%, list=18%, signal=33%
PDGF_ERK_DN.V1_UP	88	-0.252212	-1.12737	0.226824	1	1	2676	tags=28%, list=25%, signal=37%
JNK_DN.V1_UP	99	-0.266719	-1.1348	0.240664	1	0.999	2261	tags=27%, list=21%, signal=34%
RB_P130_DN.V1_UP	68	-0.300184	-1.15145	0.262195	1	0.999	3595	tags=40%, list=33%, signal=59%
ATM_DN.V1_DN	77	-0.277341	-1.10404	0.264113	1	1	1914	tags=26%, list=18%, signal=31%
MYC_UP.V1_UP	91	-0.323065	-1.16378	0.275391	1	0.999	1964	tags=25%, list=18%, signal=31%
RB_DN.V1_UP	74	-0.289397	-1.1325	0.280632	1	0.999	3038	tags=35%, list=28%, signal=49%
BCAT_GDS748_UP	25	-0.36315	-1.14951	0.282105	1	0.999	2927	tags=36%, list=27%, signal=49%
TGFB_UP.V1_DN	108	-0.250152	-1.10762	0.284274	1	1	2787	tags=28%, list=26%, signal=37%
AKT_UP_MTOR_DN.V1_UP	102	-0.272807	-1.10375	0.290526	1	1	2728	tags=29%, list=25%, signal=39%
KRAS.600_UP.V1_DN	157	-0.296468	-1.13945	0.296223	1	0.999	2092	tags=27%, list=19%, signal=33%
WNT_UP.V1_UP	112	-0.272914	-1.09642	0.297131	1	1	2352	tags=30%, list=22%, signal=38%
PRC2_SUZ12_UP.V1_UP	105	-0.262891	-1.09605	0.29979	1	1	1220	tags=19%, list=11%, signal=21%
RB_P107_DN.V1_DN	73	-0.287138	-1.09404	0.353057	1	1	1965	tags=27%, list=18%, signal=33%
BMI1_DN_MEL18_DN.V1_DN	81	-0.272154	-1.07912	0.35546	1	1	2401	tags=28%, list=22%, signal=36%
MTOR_UP.V1_DN	103	-0.252822	-1.06815	0.355967	1	1	2023	tags=22%, list=19%, signal=27%
AKT_UP.V1_DN	110	-0.253697	-1.05996	0.36646	1	1	2234	tags=22%, list=21%, signal=27%
ALK_DN.V1_DN	73	-0.267311	-1.02889	0.398357	1	1	2277	tags=27%, list=21%, signal=34%
RAPA_EARLY_UP.V1_UP	104	-0.252539	-1.02242	0.435743	1	1	2372	tags=28%, list=22%, signal=35%
KRAS.LUNG_UP.V1_UP	79	-0.260793	-1.00931	0.453027	1	1	2723	tags=34%, list=25%, signal=45%
CRX_DN.V1_UP	75	-0.230627	-0.994696	0.457203	1	1	2010	tags=23%, list=19%, signal=28%
CSR_LATE_UP.V1_UP	102	-0.274308	-0.985691	0.471816	1	1	2657	tags=27%, list=25%, signal=36%
DCA_UP.V1_UP	95	-0.239214	-0.986369	0.472393	1	1	2225	tags=29%, list=21%, signal=37%
CAMP_UP.V1_UP	114	-0.222977	-0.963004	0.472617	1	1	2653	tags=27%, list=25%, signal=36%
TBK1.DF_UP	147	-0.211636	-0.977506	0.475	1	1	2176	tags=21%, list=20%, signal=26%
BRCA1_DN.V1_UP	62	-0.267393	-0.981628	0.476	1	1	1866	tags=26%, list=17%, signal=31%
ESC_V6.5_UP_EARLY.V1_UP	83	-0.243436	-0.976931	0.486328	1	1	1474	tags=22%, list=14%, signal=25%
P53_DN.V1_DN	114	-0.233903	-0.970829	0.490421	1	1	2562	tags=27%, list=24%, signal=35%
KRAS.LUNG_UP.V1_DN	79	-0.290979	-0.955272	0.496994	1	1	2311	tags=29%, list=21%, signal=37%
KRAS.50_UP.V1_DN	31	-0.334825	-0.968572	0.502016	1	1	2518	tags=35%, list=23%, signal=46%
PKCA_DN.V1_DN	92	-0.22976	-0.971415	0.509595	1	1	3759	tags=42%, list=35%, signal=64%
IL21_UP.V1_UP	106	-0.244859	-0.969384	0.513458	1	1	1619	tags=23%, list=15%, signal=26%
CTIP_DN.V1_DN	72	-0.247632	-0.966462	0.515213	1	1	1491	tags=18%, list=14%, signal=21%
CAHOY_NEURONAL	54	-0.261685	-0.966923	0.515856	1	1	1427	tags=20%, list=13%, signal=23%
RELA_DN.V1_DN	74	-0.249736	-0.965144	0.520492	1	1	2939	tags=30%, list=27%, signal=41%
MYC_UP.V1_DN	93	-0.231642	-0.927617	0.53668	1	1	2929	tags=34%, list=27%, signal=47%
SIRNA_EIF4GI_UP	53	-0.246757	-0.941586	0.543086	1	1	3850	tags=45%, list=36%, signal=70%
RB_P107_DN.V1_UP	87	-0.258266	-0.906391	0.550725	1	1	1840	tags=20%, list=17%, signal=23%
STK33_DN	145	-0.203658	-0.947294	0.556911	1	1	3140	tags=34%, list=29%, signal=47%
PDGF_UP.V1_DN	75	-0.2328	-0.931638	0.560784	1	1	2463	tags=32%, list=23%, signal=41%
RPS14_DN.V1_DN	106	-0.218147	-0.899226	0.57438	1	1	2950	tags=31%, list=27%, signal=42%
PRC2_SUZ12_UP.V1_DN	102	-0.232853	-0.929069	0.587992	1	1	1213	tags=17%, list=11%, signal=19%
KRAS.300_UP.V1_DN	83	-0.259095	-0.909175	0.598344	1	1	2059	tags=27%, list=19%, signal=32%
CAHOY_ASTROGLIAL	57	-0.255093	-0.891295	0.598377	1	1	1500	tags=19%, list=14%, signal=22%
JAK2_DN.V1_UP	100	-0.231564	-0.915027	0.606996	1	1	1069	tags=17%, list=10%, signal=19%
PIGF_UP.V1_DN	112	-0.235914	-0.913655	0.620545	1	1	3333	tags=40%, list=31%, signal=57%
CTIP_DN.V1_UP	71	-0.235869	-0.906064	0.623274	1	1	1914	tags=25%, list=18%, signal=31%
CAHOY_ASTROCYTIC	53	-0.2374	-0.889233	0.626482	1	1	1410	tags=21%, list=13%, signal=24%
BMI1_DN.V1_UP	76	-0.238374	-0.855655	0.641975	1	1	1584	tags=18%, list=15%, signal=21%
P53_DN.V1_UP	110	-0.233605	-0.853468	0.650406	1	1	2405	tags=27%, list=22%, signal=35%
KRAS.PROSTATE_UP.V1_DN	87	-0.235894	-0.875906	0.657201	1	1	2473	tags=28%, list=23%, signal=35%
EGFR_UP.V1_DN	117	-0.195145	-0.877309	0.68254	1	1	2896	tags=28%, list=27%, signal=38%
MEL18_DN.V1_DN	90	-0.218195	-0.876309	0.688492	1	1	1964	tags=20%, list=18%, signal=24%
RAF_UP.V1_UP	115	-0.206811	-0.84725	0.69917	1	1	2807	tags=29%, list=26%, signal=38%
ATF2_S_UP.V1_DN	108	-0.206782	-0.834242	0.706499	1	1	3323	tags=38%, list=31%, signal=54%
MTOR_UP.N4.V1_DN	88	-0.212999	-0.819636	0.717949	1	1	1064	tags=14%, list=10%, signal=15%
GLI1_UP.V1_DN	16	-0.264614	-0.8008	0.73062	0.990623	1	480	tags=13%, list=4%, signal=13%
P53_DN.V2_DN	77	-0.212348	-0.834309	0.733728	1	1	1616	tags=18%, list=15%, signal=21%
PDGF_ERK_DN.V1_DN	83	-0.215721	-0.812764	0.738337	1	1	2584	tags=27%, list=24%, signal=35%
JNK_DN.V1_DN	91	-0.201871	-0.849744	0.748503	1	1	2185	tags=23%, list=20%, signal=29%
SRC_UP.V1_DN	93	-0.202886	-0.855998	0.751503	1	1	2477	tags=25%, list=23%, signal=32%
KRAS.600.LUNG.BREAST_UP.V1_DN	145	-0.209883	-0.827736	0.755061	1	1	3133	tags=34%, list=29%, signal=48%
GCNP_SHH_UP_EARLY.V1_DN	100	-0.187036	-0.863176	0.755682	1	1	2411	tags=26%, list=22%, signal=33%
PTEN_DN.V1_DN	94	-0.204336	-0.832272	0.761317	1	1	1790	tags=18%, list=17%, signal=21%
ESC_V6.5_UP_LATE.V1_DN	112	-0.186896	-0.8321	0.771484	1	1	1965	tags=22%, list=18%, signal=27%
MTOR_UP.N4.V1_UP	104	-0.185961	-0.799575	0.780488	0.981522	1	3242	tags=37%, list=30%, signal=52%
ESC_V6.5_UP_EARLY.V1_DN	109	-0.200941	-0.801137	0.785263	1	1	3382	tags=33%, list=31%, signal=48%
ATF2_UP.V1_DN	100	-0.197491	-0.805229	0.794239	1	1	3602	tags=41%, list=33%, signal=61%
AKT_UP_MTOR_DN.V1_DN	112	-0.182841	-0.820136	0.795918	1	1	2194	tags=21%, list=20%, signal=25%
STK33_NOMO_DN	147	-0.180102	-0.839487	0.799607	1	1	1618	tags=18%, list=15%, signal=21%
PRC1_BMI_UP.V1_UP	94	-0.189726	-0.803984	0.806867	1	1	3065	tags=32%, list=28%, signal=44%
ESC_V6.5_UP_LATE.V1_UP	109	-0.190858	-0.786648	0.817444	0.984449	1	2040	tags=18%, list=19%, signal=22%
CSR_EARLY_UP.V1_UP	92	-0.195932	-0.730846	0.820296	0.984228	1	3334	tags=33%, list=31%, signal=47%
PRC2_EED_UP.V1_DN	113	-0.186433	-0.687902	0.821569	0.989845	1	4037	tags=42%, list=37%, signal=67%
GCNP_SHH_UP_LATE.V1_UP	104	-0.189893	-0.712352	0.826613	0.989445	1	1006	tags=12%, list=9%, signal=13%
DCA_UP.V1_DN	107	-0.179431	-0.806407	0.832645	1	1	1560	tags=15%, list=14%, signal=17%
YAP1_DN	25	-0.226183	-0.759164	0.844864	0.99183	1	2281	tags=28%, list=21%, signal=35%
KRAS.LUNG.BREAST_UP.V1_DN	77	-0.209442	-0.737762	0.846758	0.983688	1	2116	tags=26%, list=20%, signal=32%
PRC2_EZH2_UP.V1_UP	111	-0.181656	-0.727172	0.853002	0.978902	1	2418	tags=25%, list=22%, signal=32%
CYCLIN_D1_KE_.V1_UP	113	-0.191141	-0.743586	0.855372	0.985013	1	3926	tags=43%, list=36%, signal=67%
KRAS.300_UP.V1_UP	81	-0.191045	-0.749866	0.855691	0.996204	1	2747	tags=28%, list=25%, signal=38%
KRAS.600.LUNG.BREAST_UP.V1_UP	154	-0.185132	-0.773843	0.855984	0.986621	1	2671	tags=27%, list=25%, signal=36%
NOTCH_DN.V1_UP	102	-0.186754	-0.787441	0.858586	0.994714	1	2052	tags=20%, list=19%, signal=24%
CSR_LATE_UP.V1_DN	87	-0.181664	-0.747206	0.860215	0.989864	1	2046	tags=21%, list=19%, signal=25%
KRAS.600_UP.V1_UP	153	-0.180856	-0.777214	0.882474	0.991448	1	2655	tags=27%, list=25%, signal=36%
BRCA1_DN.V1_DN	70	-0.187544	-0.768971	0.884146	0.984517	1	1018	tags=11%, list=9%, signal=13%
TGFB_UP.V1_UP	105	-0.169974	-0.662852	0.911205	0.963999	1	2444	tags=23%, list=23%, signal=29%
BCAT.100_UP.V1_DN	19	-0.227371	-0.679287	0.912046	0.988217	1	3214	tags=32%, list=30%, signal=45%
ESC_J1_UP_LATE.V1_UP	112	-0.167876	-0.678937	0.917927	0.978617	1	2261	tags=19%, list=21%, signal=23%
RAF_UP.V1_DN	116	-0.166553	-0.674934	0.92437	0.972621	1	2935	tags=27%, list=27%, signal=36%
ERB2_UP.V1_UP	104	-0.174739	-0.696591	0.924453	0.989539	1	3043	tags=29%, list=28%, signal=40%
E2F1_UP.V1_DN	121	-0.162199	-0.702683	0.933884	0.991878	1	3440	tags=34%, list=32%, signal=49%
CYCLIN_D1_UP.V1_UP	114	-0.183124	-0.664227	0.934653	0.97259	1	1433	tags=16%, list=13%, signal=18%
MEK_UP.V1_UP	117	-0.160279	-0.634722	0.953722	0.975319	1	1830	tags=17%, list=17%, signal=20%
TBK1.DN.48HRS_UP	28	-0.162276	-0.563635	0.96728	0.986592	1	4055	tags=36%, list=37%, signal=57%
IL15_UP.V1_UP	101	-0.156801	-0.617418	0.983471	0.97546	1	1291	tags=13%, list=12%, signal=14%

## Sheet: Low expression of STAT6
Table SIII. GSEA oncogenic signatures results. GSEA outcomes of the c6 (c6.all.v6.2.symbols.gmt) reference gene set for the key genes in the Janus kinase-signal transducer and activator of transcription signaling pathway in skin cutaneous melanoma. GSEA, gene set enrichment analysis. GSEA, gene set enrich analysis; ES, enrichment score; NES, normalized enrichment score; NOM, nominal; FDR, false d…
Name	Size	ES	NES	NOM P-value	FDR q-value	FWER p-value	Rank to max	Leading edge
CAHOY_OLIGODENDROCUTIC	55	0.397923	1.5403	0.0197239	1	0.7	2642	tags=42%, list=24%, signal=55%
HOXA9_DN.V1_UP	108	0.376286	1.45953	0.0788955	1	0.84	2013	tags=36%, list=19%, signal=44%
CRX_NRL_DN.V1_UP	79	0.319727	1.30873	0.0905512	1	0.965	853	tags=19%, list=8%, signal=20%
ALK_DN.V1_UP	73	0.352595	1.32551	0.1	1	0.959	1626	tags=33%, list=15%, signal=38%
STK33_NOMO_UP	142	0.349957	1.32645	0.119231	1	0.958	1863	tags=29%, list=17%, signal=34%
EIF4E_DN	57	0.388271	1.34542	0.119691	1	0.951	1998	tags=35%, list=18%, signal=43%
CYCLIN_D1_KE_.V1_DN	97	0.31952	1.28825	0.12753	1	0.971	2080	tags=35%, list=19%, signal=43%
RELA_DN.V1_UP	84	0.313589	1.23962	0.169661	1	0.985	2607	tags=38%, list=24%, signal=50%
CORDENONSI_YAP_CONSERVED_SIGNATURE	38	0.382704	1.27478	0.194175	1	0.977	2415	tags=39%, list=22%, signal=51%
ATM_DN.V1_UP	76	0.296281	1.18903	0.202756	1	0.994	1309	tags=24%, list=12%, signal=27%
KRAS.AMP.LUNG_UP.V1_DN	71	0.306311	1.16782	0.219512	1	0.995	1903	tags=32%, list=18%, signal=39%
SNF5_DN.V1_UP	106	0.318593	1.22128	0.226069	1	0.986	1663	tags=29%, list=15%, signal=34%
CAMP_UP.V1_DN	121	0.285868	1.19633	0.226667	1	0.992	2485	tags=30%, list=23%, signal=38%
IL2_UP.V1_DN	94	0.292162	1.1498	0.228407	1	0.998	1903	tags=32%, list=18%, signal=38%
P53_DN.V2_UP	87	0.307204	1.15636	0.243564	1	0.997	1838	tags=29%, list=17%, signal=34%
LTE2_UP.V1_UP	105	0.262432	1.09205	0.2875	1	1	2294	tags=30%, list=21%, signal=37%
CYCLIN_D1_UP.V1_DN	101	0.249409	1.08339	0.311508	1	1	2131	tags=29%, list=20%, signal=35%
KRAS.BREAST_UP.V1_DN	75	0.281923	1.07528	0.317227	1	1	1847	tags=31%, list=17%, signal=37%
RPS14_DN.V1_UP	105	0.331616	1.09889	0.338057	1	0.999	1737	tags=28%, list=16%, signal=33%
IL21_UP.V1_DN	96	0.266394	1.05854	0.34556	1	1	2599	tags=35%, list=24%, signal=46%
CRX_DN.V1_DN	86	0.255007	1.05796	0.348162	1	1	990	tags=17%, list=9%, signal=19%
PTEN_DN.V2_DN	76	0.259507	1.04731	0.368526	1	1	2686	tags=33%, list=25%, signal=43%
KRAS.50_UP.V1_UP	27	0.32774	1.05647	0.382178	1	1	2405	tags=37%, list=22%, signal=47%
NRL_DN.V1_UP	82	0.249099	1.04225	0.394118	1	1	1258	tags=20%, list=12%, signal=22%
NOTCH_DN.V1_DN	95	0.256661	1.00791	0.411523	1	1	1501	tags=22%, list=14%, signal=25%
STK33_SKM_UP	147	0.252851	1.03626	0.413861	1	1	2442	tags=35%, list=23%, signal=44%
CSR_EARLY_UP.V1_DN	74	0.267807	1.02843	0.420319	1	1	2608	tags=30%, list=24%, signal=39%
ATF2_UP.V1_UP	108	0.240824	1.00733	0.42998	1	1	2218	tags=28%, list=20%, signal=35%
KRAS.PROSTATE_UP.V1_UP	71	0.261344	1.01633	0.433735	1	1	2266	tags=32%, list=21%, signal=41%
KRAS.BREAST_UP.V1_UP	68	0.27553	1.00231	0.441948	1	1	1882	tags=29%, list=17%, signal=35%
PIGF_UP.V1_UP	106	0.301077	1.00529	0.442495	1	1	2501	tags=32%, list=23%, signal=41%
BCAT_BILD_ET_AL_DN	29	0.325115	0.968703	0.486486	1	1	2559	tags=38%, list=24%, signal=50%
NFE2L2.V2	250	0.210909	0.984486	0.492901	1	1	1858	tags=27%, list=17%, signal=32%
KRAS.KIDNEY_UP.V1_DN	75	0.259412	0.953985	0.509278	1	1	1547	tags=28%, list=14%, signal=32%
VEGF_A_UP.V1_DN	118	0.261185	0.927192	0.513026	1	1	1168	tags=17%, list=11%, signal=19%
ESC_J1_UP_LATE.V1_DN	108	0.214176	0.936586	0.52621	1	1	2039	tags=25%, list=19%, signal=30%
STK33_UP	144	0.239938	0.926205	0.544423	1	1	2175	tags=27%, list=20%, signal=33%
KRAS.LUNG.BREAST_UP.V1_UP	77	0.253283	0.937875	0.548323	1	1	2544	tags=36%, list=23%, signal=47%
ATF2_S_UP.V1_UP	97	0.224249	0.960733	0.553571	1	1	2787	tags=38%, list=26%, signal=51%
CRX_NRL_DN.V1_DN	63	0.222319	0.903522	0.579568	1	1	2104	tags=24%, list=19%, signal=29%
HOXA9_DN.V1_DN	104	0.217377	0.90636	0.580952	1	1	2240	tags=28%, list=21%, signal=35%
BMI1_DN_MEL18_DN.V1_UP	72	0.253989	0.891194	0.584158	1	1	2437	tags=33%, list=23%, signal=43%
EGFR_UP.V1_UP	114	0.23867	0.898979	0.597656	1	1	2959	tags=37%, list=27%, signal=50%
LEF1_UP.V1_DN	109	0.218126	0.928672	0.601923	1	1	1773	tags=22%, list=16%, signal=26%
PTEN_DN.V1_UP	99	0.219482	0.902188	0.618955	1	1	1467	tags=18%, list=14%, signal=21%
JAK2_DN.V1_DN	73	0.231759	0.885995	0.627016	1	1	1402	tags=21%, list=13%, signal=23%
GCNP_SHH_UP_EARLY.V1_UP	99	0.21294	0.832275	0.670565	1	1	2735	tags=36%, list=25%, signal=48%
WNT_UP.V1_DN	99	0.209516	0.875984	0.681467	1	1	2123	tags=29%, list=20%, signal=36%
GCNP_SHH_UP_LATE.V1_DN	104	0.22281	0.846957	0.687623	1	1	1264	tags=19%, list=12%, signal=22%
E2F3_UP.V1_DN	74	0.20997	0.874831	0.689394	1	1	1013	tags=16%, list=9%, signal=18%
GLI1_UP.V1_UP	21	0.253843	0.829088	0.70428	1	1	1282	tags=14%, list=12%, signal=16%
RAPA_EARLY_UP.V1_DN	109	0.211395	0.847074	0.708	1	1	2145	tags=26%, list=20%, signal=32%
SIRNA_EIF4GI_DN	59	0.228924	0.83711	0.713178	1	1	455	tags=12%, list=4%, signal=12%
PDGF_UP.V1_UP	88	0.200042	0.848523	0.713427	1	1	1706	tags=22%, list=16%, signal=25%
STK33_SKM_DN	137	0.194809	0.854818	0.725838	1	1	1112	tags=16%, list=10%, signal=18%
MEL18_DN.V1_UP	73	0.218529	0.789336	0.727273	1	1	2437	tags=32%, list=23%, signal=40%
LTE2_UP.V1_DN	118	0.198433	0.769608	0.747148	1	1	3211	tags=42%, list=30%, signal=58%
PKCA_DN.V1_UP	82	0.215999	0.813881	0.75625	1	1	1819	tags=27%, list=17%, signal=32%
RB_P130_DN.V1_DN	81	0.211069	0.756788	0.764228	0.975888	1	2604	tags=31%, list=24%, signal=40%
MEK_UP.V1_DN	115	0.199096	0.765991	0.778443	0.988233	1	3297	tags=43%, list=30%, signal=62%
TBK1.DF_DN	170	0.195891	0.734343	0.782435	0.944293	1	2493	tags=26%, list=23%, signal=34%
KRAS.AMP.LUNG_UP.V1_UP	76	0.206682	0.79697	0.796748	1	1	1924	tags=24%, list=18%, signal=29%
ESC_J1_UP_EARLY.V1_DN	113	0.18578	0.806345	0.79716	1	1	1406	tags=18%, list=13%, signal=20%
NRL_DN.V1_DN	69	0.195814	0.83387	0.800399	1	1	1063	tags=14%, list=10%, signal=16%
KRAS.KIDNEY_UP.V1_UP	75	0.205108	0.780254	0.81323	1	1	2375	tags=29%, list=22%, signal=37%
YAP1_UP	25	0.222017	0.774513	0.824324	1	1	2440	tags=32%, list=23%, signal=41%
IL2_UP.V1_UP	110	0.189888	0.740688	0.833656	0.961127	1	2316	tags=27%, list=21%, signal=34%
RB_DN.V1_DN	64	0.205797	0.766543	0.839034	1	1	1225	tags=17%, list=11%, signal=19%
SNF5_DN.V1_DN	97	0.198032	0.798967	0.843212	1	1	1374	tags=16%, list=13%, signal=19%
E2F3_UP.V1_UP	99	0.175264	0.765871	0.843396	0.973609	1	1368	tags=14%, list=13%, signal=16%
PRC2_EZH2_UP.V1_DN	101	0.17565	0.736615	0.857977	0.954016	1	1757	tags=20%, list=16%, signal=23%
MTOR_UP.V1_UP	90	0.182205	0.746032	0.864811	0.965779	1	1391	tags=16%, list=13%, signal=18%
ERB2_UP.V1_DN	118	0.186167	0.627181	0.872832	0.983784	1	3539	tags=43%, list=33%, signal=64%
VEGF_A_UP.V1_UP	110	0.185942	0.709587	0.884462	0.941867	1	1303	tags=16%, list=12%, signal=18%
E2F1_UP.V1_UP	100	0.173752	0.682881	0.892783	0.948605	1	2688	tags=28%, list=25%, signal=37%
IL15_UP.V1_DN	88	0.182517	0.712137	0.901381	0.95106	1	1737	tags=20%, list=16%, signal=24%
PRC2_EED_UP.V1_UP	105	0.178981	0.756014	0.907258	0.963054	1	2992	tags=37%, list=28%, signal=51%
KRAS.DF.V1_DN	109	0.177772	0.714973	0.918489	0.96026	1	2719	tags=33%, list=25%, signal=44%
LEF1_UP.V1_UP	112	0.173034	0.69531	0.930368	0.94688	1	2343	tags=27%, list=22%, signal=34%
BCAT_BILD_ET_AL_UP	28	0.187794	0.60202	0.960396	0.984987	1	1571	tags=21%, list=15%, signal=25%
KRAS.DF.V1_UP	123	0.146129	0.588244	0.991786	0.97808	1	1606	tags=15%, list=15%, signal=18%
